# Supplementary material for: Genes regulating gland development in the cotton plant
Source: PubMed Central journal article supplement (PMC6523598; doi:10.1111/pbi.13044), 2018-12-21
Supplement: PBI-17-1142-s001.pdf [file PBI-17-1142-s001.pdf]

## **Genes regulating gland development in the cotton plant**

Madhusudhana R. Janga<sup>1</sup>, Devendra Pandeya<sup>1</sup>, LeAnne M. Campbell<sup>1</sup>, Kranti Konganti<sup>2</sup>,  
Stephany Toinga Villafuerte<sup>1</sup>, Lorraine Puckhaber<sup>3</sup>, Alan Pepper<sup>4</sup>, Robert D. Stipanovic<sup>3</sup>,  
Jodi A. Scheffler<sup>5</sup>, Keerti S. Rathore<sup>1,6\*</sup>

<sup>1</sup>Institute for Plant Genomics & Biotechnology, Texas A&M University, College Station, TX, 77843-2123, USA; <sup>2</sup>Texas A&M Institute for Genome Sciences and Society, Texas A&M University, College Station, TX, 77843; <sup>3</sup>Southern Plains Agricultural Research Center, USDA-ARS, College Station, TX, USA; <sup>4</sup>Dept. of Biology, Texas A&M University, College Station, TX, 77843; <sup>5</sup>Crop Genetics Research Unit, USDA-ARS, Stoneville, MS, USA; <sup>6</sup>Dept. of Soil & Crop Sciences, Texas A&M University, College Station, TX, 77843-2474, USA.

\*Corresponding author: Keerti S. Rathore  
Institute for Plant Genomics & Biotechnology  
Dept. of Soil & Crop Sciences  
Texas A&M University  
College Station, TX 77843-2123, USA  
Email: [rathore@tamu.edu](mailto:rathore@tamu.edu)  
Phone: (979) 862 4795  
Fax: (979) 862 3414

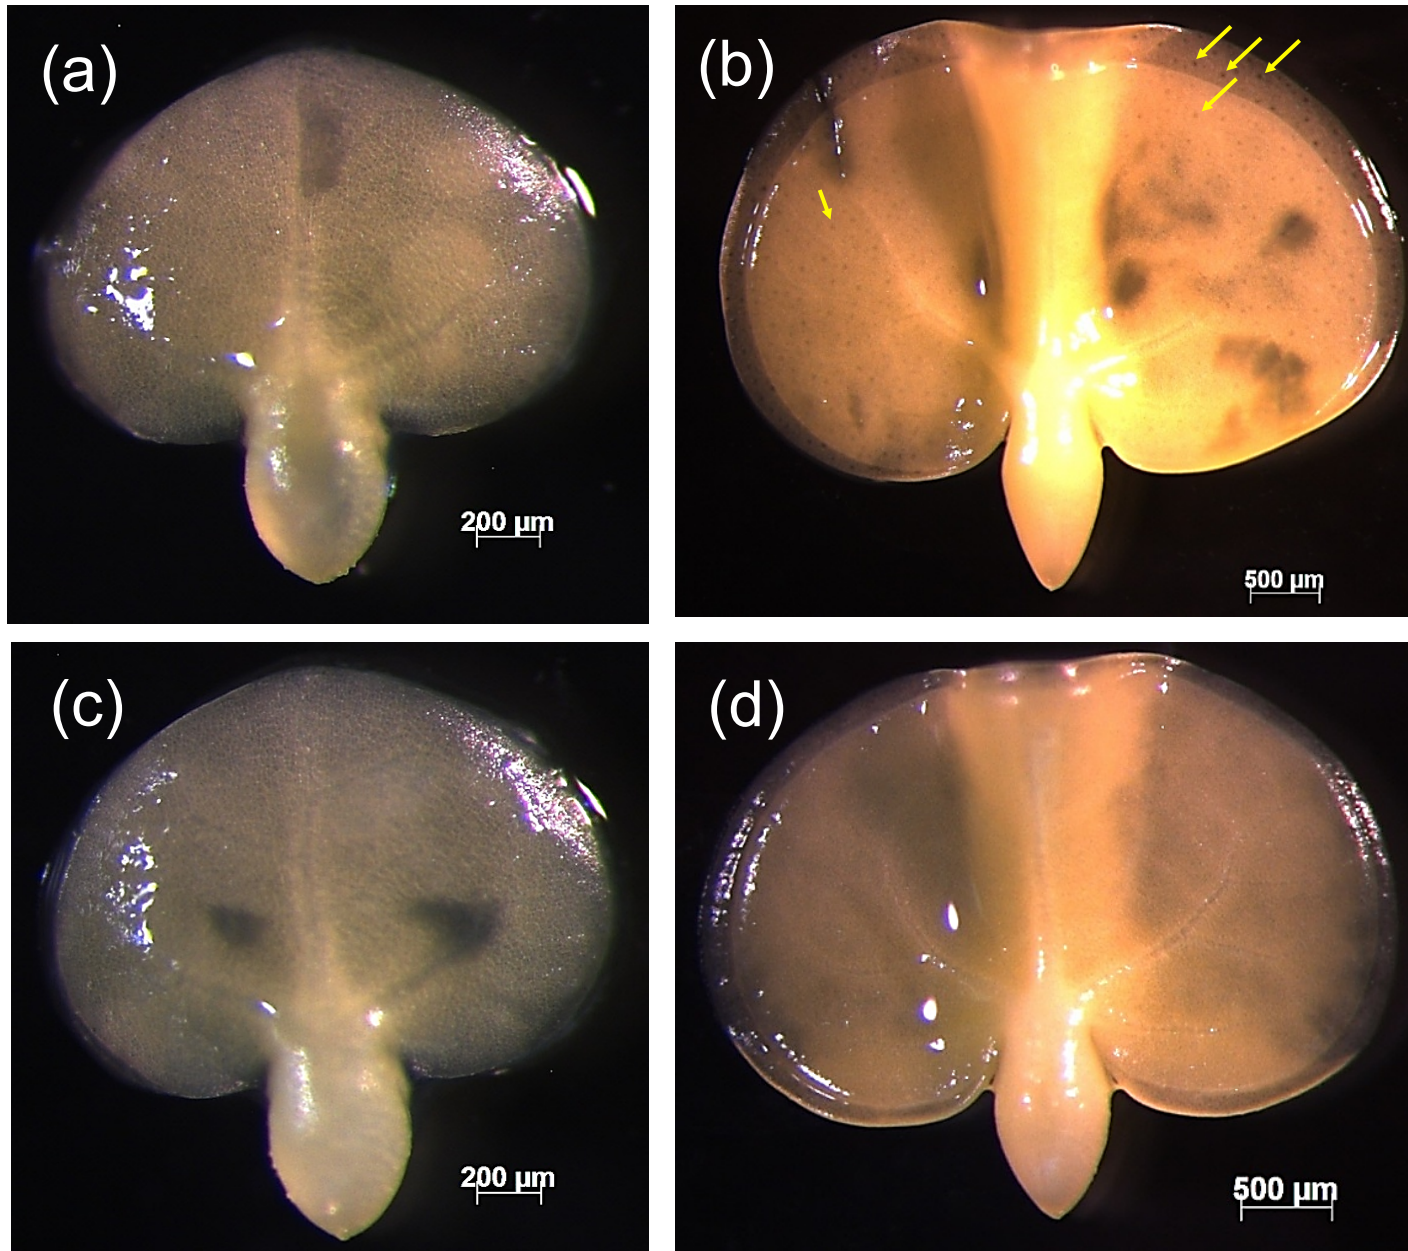

**Figure S1** Microscopic images of developing embryos of Stoneville 7A glanded (GL; GVS4) and glandless (gl; GVS5), near-isogenic lines, used for comparative RNA-seq analysis. (a) 14-days post-anthesis (dpa) glanded embryo; (b) 16-dpa glanded embryo, the arrows indicate glands that are visible microscopically; (c) 14-dpa glandless embryo; (d) 16-dpa glandless embryo.

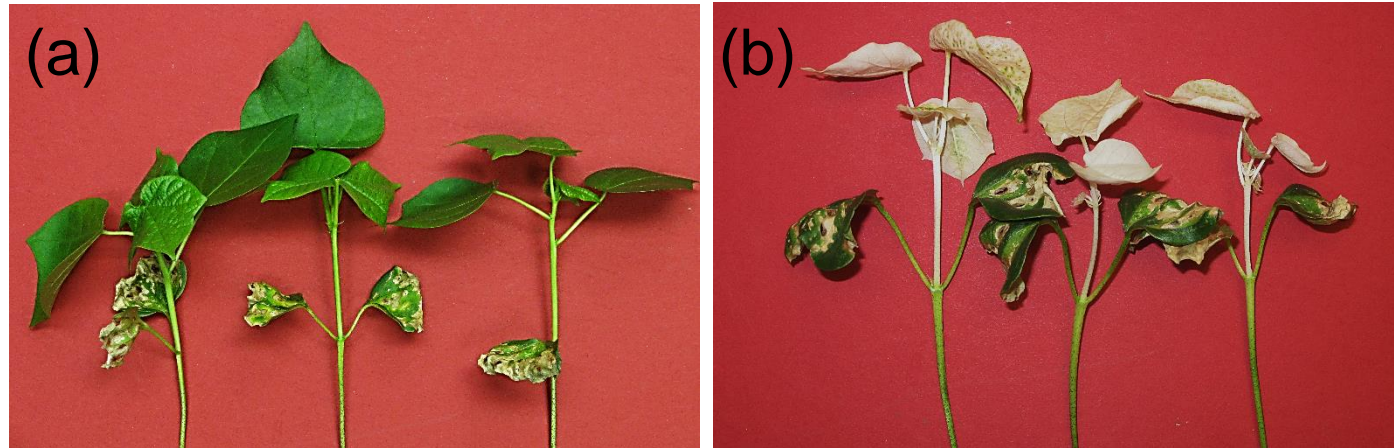

**Figure S2** Virus Induced Gene Silencing (VIGS) in cotton. (a) empty vector (RNA1 and RNA2) infiltrated plants. (b) plants subjected to VIGS-mediated silencing of *GhCLA* gene. The leaves showing albino phenotype indicate the efficacy of the VIGS treatment. The photographs were taken four weeks after infiltration.



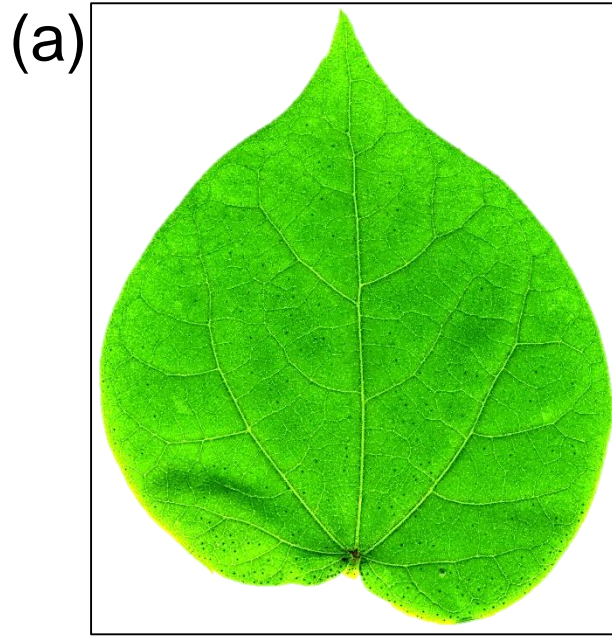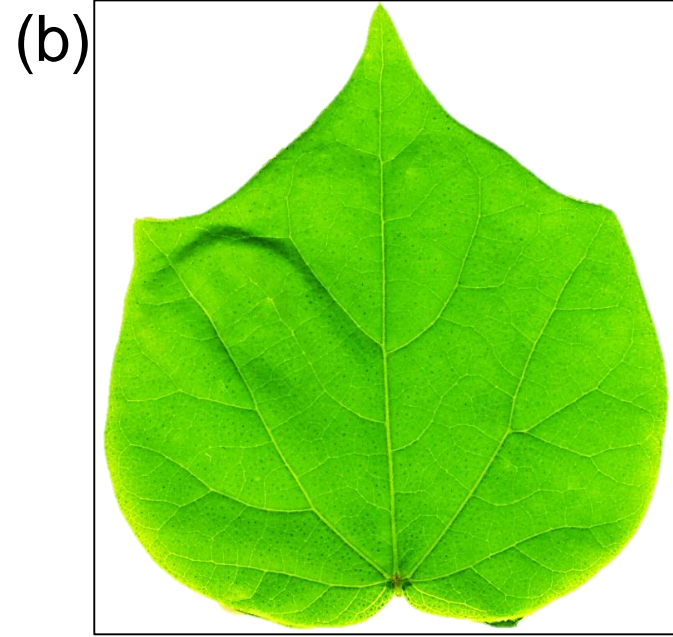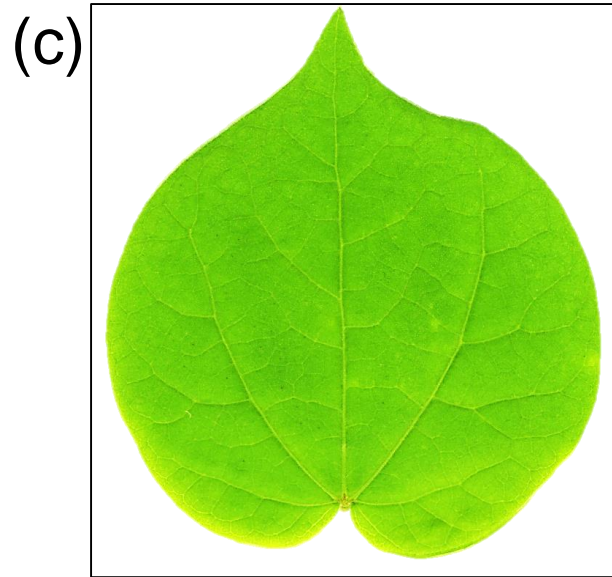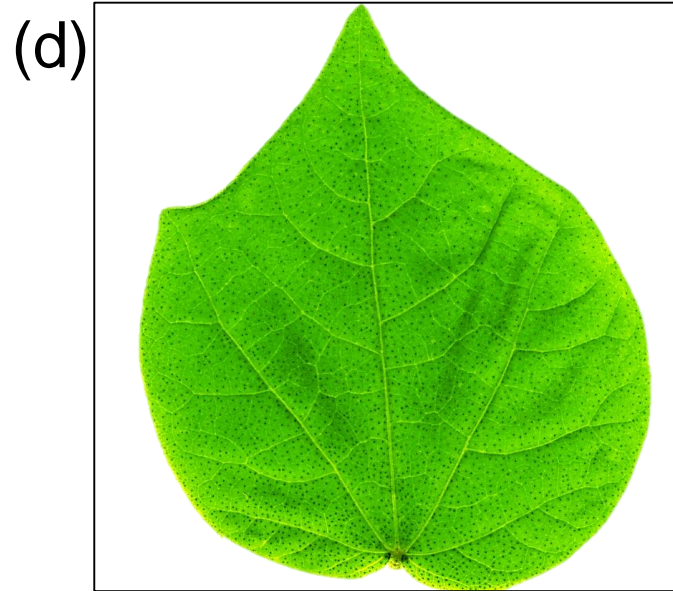

**Figure S3** Leaves from plants that had undergone Virus-induced Gene Silencing against *CGF* genes showing the effects on gland formation. (a) silencing of *CGF1* gene, (b) silencing of *CGF2* gene, (c) silencing of *GoPGF* (synonym *CGF3*) gene, (d) empty vector control.

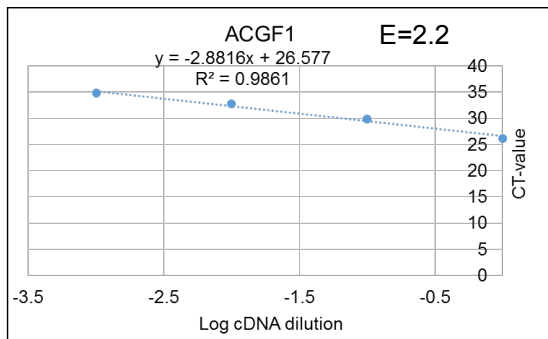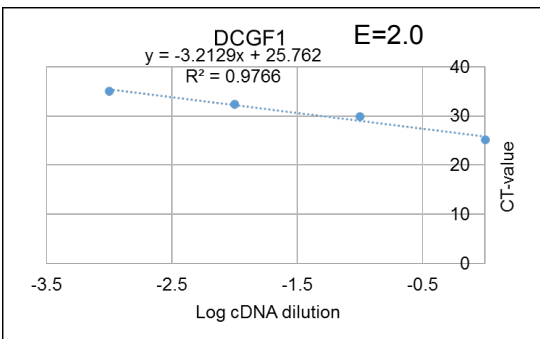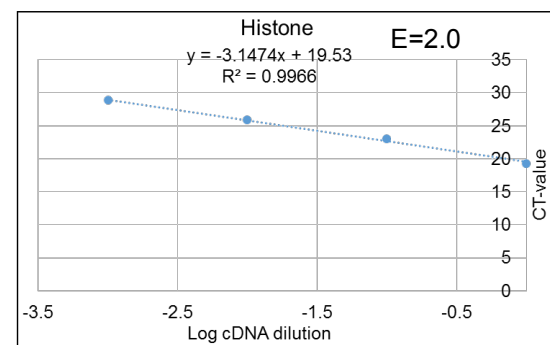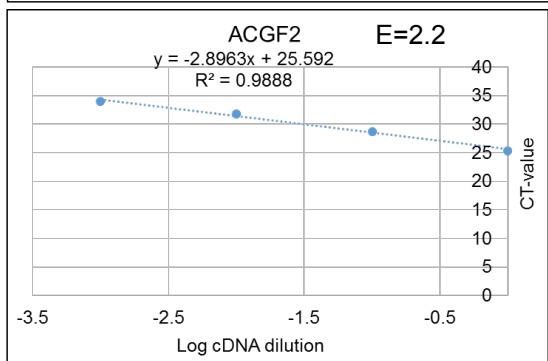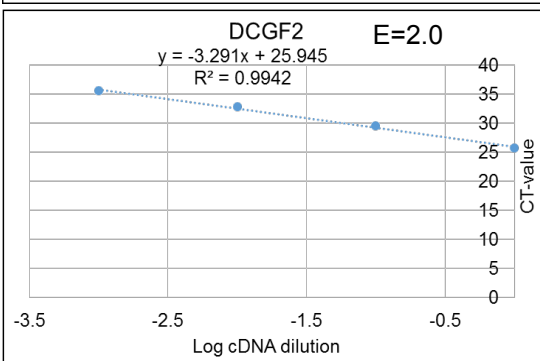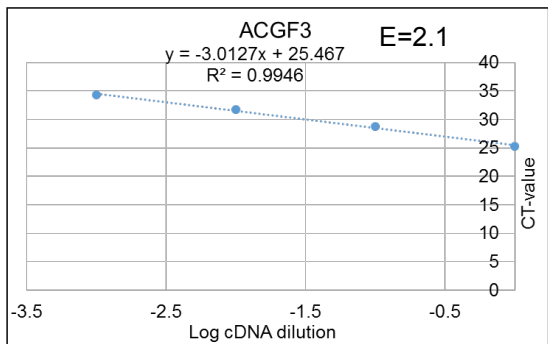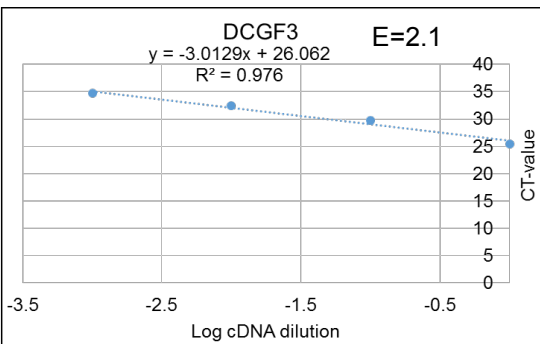

**Figure S4** Real-time PCR standard curves representing PCR efficiency for each of the CGF homeologs and Histone gene.

ACGF1-GVS4 TCTCTCCAAAATCAACCATACTCACAATGCCACTTTTATTAATAAATGACATTTCTTCAAAAATAGTCTTCATTCTCTCTAATTAATAGGAGATTTGATGGAGGAATCACATTATTTTGAATGACAAGAAGGCATGATTATGAG 150

ACGF1-GVS5 ..... 150

ACGF1-TM1 ..... 150

ACGF1-GVS4 ATATATGTACGGGGCAACAATTTAATAATGACAAAGTTTATTATATTATTCGATGAATCTTTTCATTTCACATCAAAAGTAAATGTTCAATGAATTTGCTTCTACCCTTTGCTTCACGTACTTCAAAAATAATGAAAACCTCAATATAAA 300

ACGF1-GVS5 ..... 300

ACGF1-TM1 ..... 300

ACGF1-GVS4 TTGTGATAAGTTGGTGAATAATAGTGTAGTTTCATGATGTTGTGTAATAATTAATCTCGTTAAAAATTTTATTATATGATATTATAAAGTGGTGAATTTGAATTTTTTAATTTTTTTTATTATAATAATAACCTGAAATTAATGATGA 450

ACGF1-GVS5 ..... 450

ACGF1-TM1 ..... 450

ACGF1-GVS4 GTAGAATTAAGTAAAAATTCATAGTATCCATCTACTAAAGGTTATATTTGATTTTGTCAATTCATTTGAAAAAATGAATAAATTCATCCTTATAAGTTAGAGACCAGAAACAAAATGGCTATTTTGTAAAAATTTATTCATTAT 600

ACGF1-GVS5 ..... 600

ACGF1-TM1 ..... 600

ACGF1-GVS4 ACTTTTAAAGTATGATGTGACTATCGAAGTAACTAAATAGCAACATGTTGGTATGCCACATGTACCTCATGCTAATGTGACACATATTACCATATCAACAAATATTTAAAAATTAATAAAATCTAAAAATAAATAGACAAATAGTTGTA 750

ACGF1-GVS5 ..... 750

ACGF1-TM1 ..... 750

ACGF1-GVS4 CCCAAGTTCATCCTAGACGTTGTTTTAAAAATAATTATAAAAAATTAATATTTTTTTTAAAAATTAATGTTGTCCACATAAGCATAAGGTATACGTGGCACAATTAATGTTGTTATTTGATTGCTTCGTCAGTTACGTAATCATTAAAAAGC 900

ACGF1-GVS5 ..... 900

ACGF1-TM1 ..... 900

ACGF1-GVS4 ATAAATGGATGAATTTTTTAAACAGGACTTCCATTATTAAAGTAAAAAGAGTAAATTAACAATCCAACCTTAATTAAGGTATCTTTATGGCCTTTTACCTTAATTAATCCATGTCACCTAAAAATTCGAAATCATCACATATAAATAG 1050

ACGF1-GVS5 ..... 1050

ACGF1-TM1 ..... 1050

ACGF1-GVS4 AAATTTTAAACAAAATAATAATTTACATTTTTTTTCTAATTTACTATTTTTTAAATAAAAAACAAAATGCAATCCATATTTTAAACACTGTATCACAACATAAAAGGAAAGTAGATAAGTTTAAAAAGTAGGTTGAGACAAGAAATGT 1200

ACGF1-GVS5 ..... 1200

ACGF1-TM1 ..... 1200

ACGF1-GVS4 GTGATGAATTAATTAAGGGTAAAGATAAAAAATAATTTTTTATTTTGGTTCAACAGTTGCCCTCTTGAGTTTAGTATAGGAAACATTTAAAAATGGTTTAAATGCTATTCCTTGTAAAAATGGTTTAAATGATTTTGGTATTGATTGA 1350

ACGF1-GVS5 ..... 1350

ACGF1-TM1 ..... 1350

ACGF1-GVS4 GGTTTAAGATAAAAAGAAAGAAAAGAGAAGAAATTTGATGTAAACGCAACAAATGAGGGAGGAGGACCCACACGCATCAGTAGTCAGTCAGTCACTGGGCTTTCGCTATCACCTTCATGCTAGTCTGCTAATAGTCCCCCC 1500

ACGF1-GVS5 ..... 1500

ACGF1-TM1 ..... 1500

ACGF1-GVS4 CCCCCCCCCCAACCCCTCCATCTTCGTATCTGGCCCTTATAAACCCCAACGCCCCCTCCAACCTCTCATTCCATTCCACACCTCCCTGTTTTCTCCTTTCGTACCAGTGAAGACCTCATAAATCTCTCCCTCTTCATCTCTTCT 1650

ACGF1-GVS5 ..... 1650

ACGF1-TM1 ..... N----- 1638

ACGF1-GVS4 CTGGTTTCCTTTCCAGGAACCTCCGTCCTCAATCTTCAGCAGAGGCTGCAGTTTGTAAATCAAAAGCCAGCAAGATTTGTGGGCATATGCTATATTATGGCAGACACTGAACGATGACCTGGGTCGCTGTCTTGGCTTGGGGAGAT 1800

ACGF1-GVS5 ..... 1800

ACGF1-TM1 ..... 1788

ACGF1-GVS4 GGTCATCTTCAATGCACATAAGATGCTTCTCCAAGTTGAGTTCCGGCTTCCACAGCGAACGAACTAAGGTGATTAAGGAATCCAAGCCCTCATTGGAGACCAACATGACATCGATTGCTATGATCGACGGAAACCGATATCACTGAT 1950

ACGF1-GVS5 ..... 1950

ACGF1-TM1 ..... 1938

ACGF1-GVS4 GTCGAATGGTCTATATGATGTCATGGCTCGATCCTTCTCTGCTGGCGAAGGGATTCTGGCAAGGCTCTTAGTACTGGGTCTTGGTTGGTTAACTGGTGCTCATGAGTTGCAATTTTACAATTGTGAAAGAGCTAGAGAAGCCCAA 2100

ACGF1-GVS5 ..... 2100

ACGF1-TM1 ..... 2088

ACGF1-GVS4 ATGCATGGCCTTGAACACTGGTTTGCATACCCACTTCTTGTGGTGTCTTGAACCTAGGATCCTCAGAGATTATCAGGAAAACCTGGGTTTAGTCCAGCAAGTGAATCCCTATTGAAATCCGATCTCATTGGTCTGGTTCCAAAACAA 2250

ACGF1-GVS5 ..... 2250

ACGF1-TM1 ..... 2238

ACGF1-GVS4 TCGACTCCTCCAAATTTAACCCAGCTTCGGTCCAGTTCCTTAAACAGAAATATCTCATTTCAGACATCGGCATAATAGCGGGTGTTCAGGAAGAAGCGGTGCAAGCCAGGATATTAACCAAAAGCAAGAGCATAACAAATAACCAAAAC 2400

ACGF1-GVS5 ..... 2400

ACGF1-TM1 ..... 2388

ACGF1-GVS4 AAGAAAGATTCCTCAAACTTGGGCAACCTCTTATGTGACTCAGAGCATTCGGATTCTGATTTTCCATTACTAGCCATGAATAACGTGGAGAGCGAACCCCAAGAAACGAGGAAGGAAACCCGGGCTCGGACGAGAGACCCGTTG 2550

ACGF1-GVS5 ..... 2550

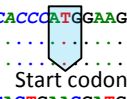

Start codon

```

ACGF1-TM1 ..... 2538
ACGF1-GVS4 AATCAATGTTGGAAGCGGAGAGGCAACGCCGTGAGAAGCTGAACCACAGATTCTACGCTCTCCGAGCAGTAGTCCCGAACGTTGTCGCGCATGGACAAAGCATCGCTCTTATCTGACGCTGTTCCCTACATCAATGATCTAAAGGCAGAAAT 2700
ACGF1-GVS5 ..... 2700
ACGF1-TM1 ..... 2688
ACGF1-GVS4 GATGAATTAGAGTCGCAGCTTCAGAGAGAGTGAAGAAAGTGAAGGTAGAAATGGTTGATACAATGGATAACCAAGCACCCTACTACTACCACATCTGAGGAAGAGCAACAGGCAGCCAGGCCAGCTATTCATCTCCTGGAACTGGG 2850
ACGF1-GVS5 ..... 2850
ACGF1-TM1 ..... 2838
ACGF1-GVS4 AGTGGCATTGAACTGGAGGTCAAGATTATGGTAAATGATGCAATGATAAGGGTTCACCTCAGAGAATGTGAACATATCCAGCAGCTAGGCTAATGGGTGCCCTTCGTGACTTGGAAATCCAGGTCCGTCATGCAAGCATGTCGCTCTGTTAAC 3000
ACGF1-GVS5 ..... 3000
ACGF1-TM1 ..... 2988
ACGF1-GVS4 GACCTCATGCTTCAAGACATAGTGGTCAGGCTTCCGTATGGGTTGAGAAGCTGAAGAAAGCCCTCAAATCTGCTCCTCAGGAGGCTAGATCTGCAGTAAAGGTTTATTATGGTTATCCAGAGTTTGTATTTTAAATGCTCTATTTCCTC 3150
ACGF1-GVS5 ..... 3150
ACGF1-TM1 ..... 3138
ACGF1-GVS4 CTACTTCTTCAGTTATTTGTTTAACTTTGCTTCATCTCAGGTTTCTTTAGCCGTTCTTTGCTTTCTGCTTGTACTATGTAACCTTTGGGAGAGGGTTCTGCACTGCTTCTTTTATCAAATGTTCTATATTTATCTAG 3300
ACGF1-GVS5 ..... 3300
ACGF1-TM1 ..... 3288
ACGF1-GVS4 TGCTGTTCCCCGAGTTAAGGACAAATAATTCCTTAATGGATTATACACATACAAAAAGAACGGAAACAATATTCGTGCATGTTTATCAACTAGAAACCAATCCATGCCAAAAACATGTATAATAATGTCTGCCCTATTTAAGGAC 3450
ACGF1-GVS5 ..... 3450
ACGF1-TM1 ..... 3438
ACGF1-GVS4 TCAAATATACATATTTT 3467
ACGF1-GVS5 ..... 3467
ACGF1-TM1 ..... 3455

```

Stop codon

**Figure S5** Alignment of *A* subgenome *CGF1* gene sequences from GVS4 (glanded) and GVS5 (glandless, recessive mutant) near-isogenic lines. Gene sequence of Texas Marker-1 (TM-1, a widely used genetic standard) is also provided for comparison purpose. The ~3.47 kb sequence of *A CGF1* representing the promoter region (~1.59 kb), 5'-UTR (italics), coding region, 3'-UTR (italics), and the terminator is identical between GVS4 and GVS5. Translation initiation codon and stop codon are indicated.





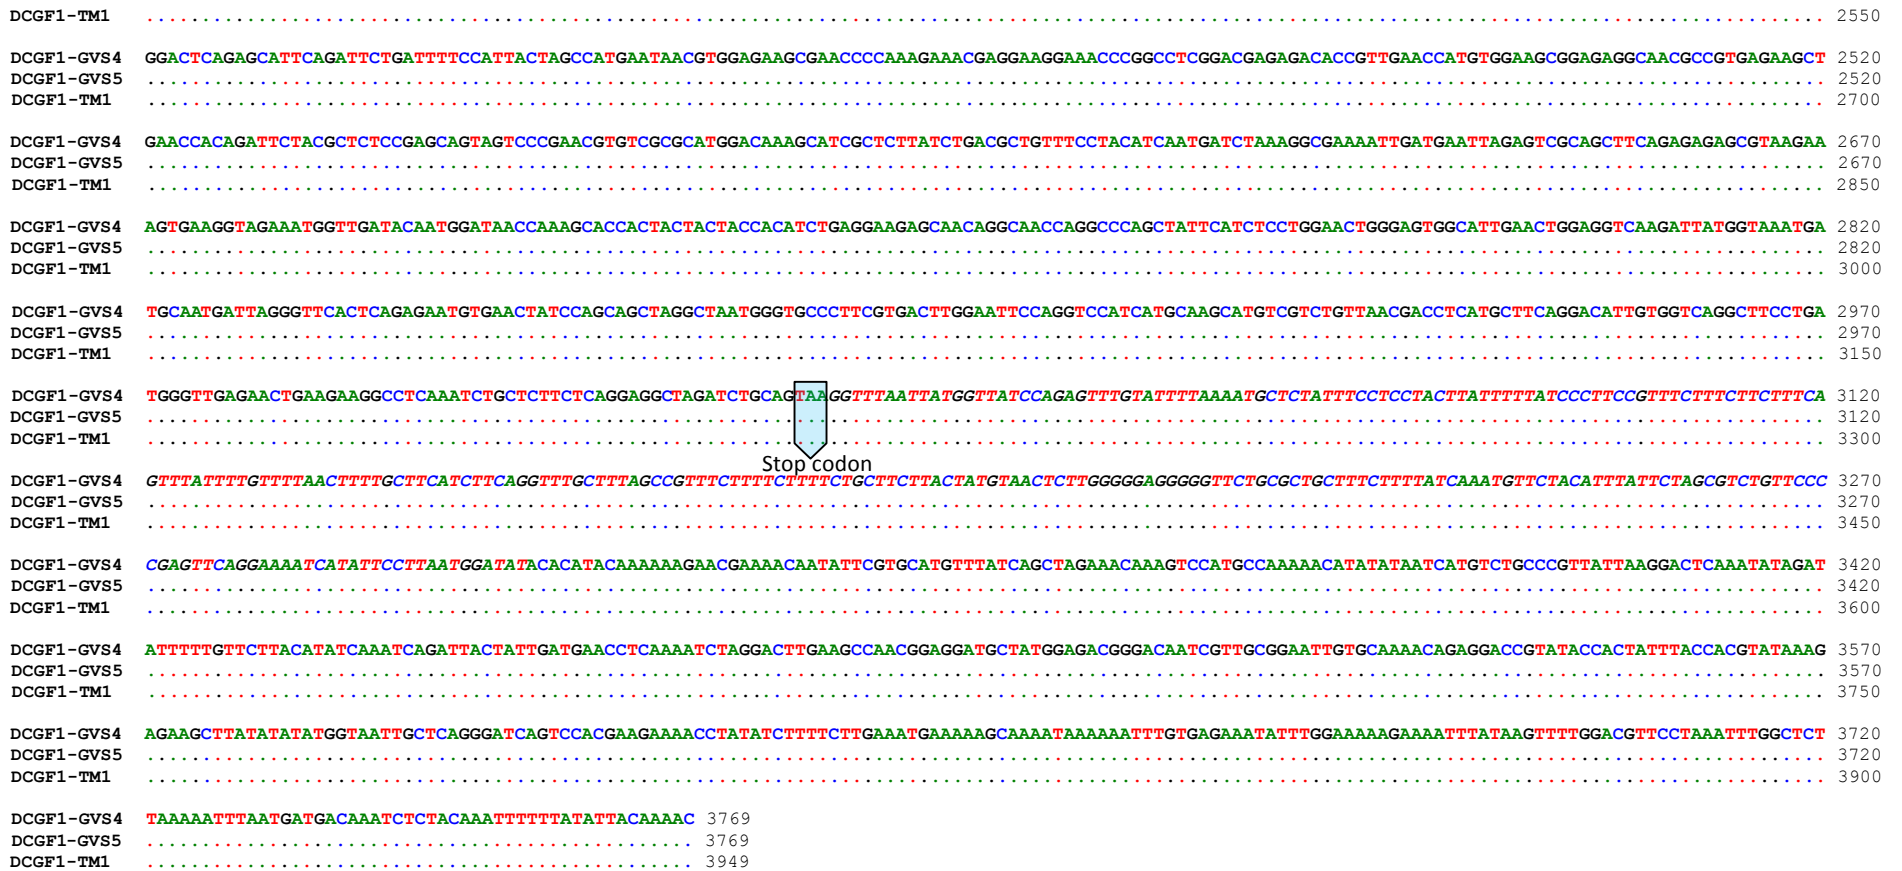

**Figure S6** Alignment of D subgenome *CGF1* gene sequences from GVS4 (glanded) and GVS5 (glandless, recessive mutant) near-isogenic lines. Sequence of Texas Marker-1 (TM-1, a widely used genetic standard) is also provided for comparison purpose. The ~3.77 kb sequence of *D CGF1* representing the promoter region (~1.5 kb), 5'-UTR (italics), coding region, 3'-UTR (italics), and the terminator is identical between GVS4 and GVS5. Translation initiation codon and stop codon are indicated.

ACGF2-GVS4 CAATATTACCTGGCTAGTAATGAACCTAATTAGGGCTTCAATCTCTCTTCAGGCATAAAGAATGTTTAGGAATTGGTGGATTGTTCAACAAGTGTGACTTCAGCAATCACTTGTAGTAACATCCATAGCCTTCAATGAGGTTTCT 150  
ACGF2-GVS5 ..... 150  
ACGF2-TM1 ..... 150  
CDS ----- 1

ACGF2-GVS4 CCCTCTACCTCAGTAGTAACATAAAAAATATCATTTCCTTTTCAATAACAGTCACCTTGATGACAATTTTTTTTAGGCAAAGATTAGAGCATCTTTGTAAACAGCTCTAAGTTTGAGTATCTTCCACCAGGCAAAAACCTAATTTT 300  
ACGF2-GVS5 ..... 300  
ACGF2-TM1 ..... 300  
CDS ----- 1

ACGF2-GVS4 AAATGTCATAAAGCTTTCATAGAAATTTAGATAAGGCTTATTGTATACATTGTTAAAGTTTCAAATCTCGTAGTCAGCATTGAAAGTTTGGATTACTTCCAAATTTGGTCTTTATAAGTAGTTTCAAGAATAGTCTAAGCTTCTCTAG 450  
ACGF2-GVS5 ..... 450  
ACGF2-TM1 ..... 450  
CDS ----- 1

ACGF2-GVS4 CAAATGATCATTAGATATTGACCTAAAACTTGAGGATTAACTCTAGAGAAAAATCCTTAAAGTCTTAGAGTTTGATTAGCCAAATTTCTCTTCATCATTAGTCTAAGTTAGTTTAGTTTGGAGTTTCTCACCCATATACACTAGT 600  
ACGF2-GVS5 ..... 600  
ACGF2-TM1 ..... 600  
CDS ----- 1

ACGF2-GVS4 TATTAGTAGCTCCTAACCCAGTCAAAATGAGTGCCAAAGATTTTTTCATCCATGAACCTTGATAAAGCATCATCCTTACCTTCTACTAGGCATAGTTTGTACCATCCAACATGGGGGAACCTGGGGCTATTAGTCCCTCCATCTTAATTGCAA 750  
ACGF2-GVS5 ..... 750  
ACGF2-TM1 ..... 750  
CDS ----- 1

ACGF2-GVS4 ATCAAAAATAGGATCACAACTTAGTACATTAAGTGTCTAGCTCTGATACCAAATATGGATTCTTTGAAATTTGCCTTGCAATTTTTCATCCAATTTGTAACTAGATGAAGTGAATTAATAGTTATGAAACGAGAGATGGAAAAAAGAGTTT 900  
ACGF2-GVS5 ..... 900  
ACGF2-TM1 ..... 900  
CDS ----- 1

ACGF2-GVS4 GGTTCGCGAGTTCAAAAATTTCTACATTTGTAGAGCTTTACCCAAAGAGTAACTACTATAAAATCAATATGTATAAGACGCTTATTTAAGTTCAACTCACTCACTAAGTTGCAACCCCTACTCCATATACTTCAATCTAGATCACTTTCCAA 1050  
ACGF2-GVS5 ..... 1050  
ACGF2-TM1 ..... 1050  
CDS ----- 1

ACGF2-GVS4 CTAAGTATAGCTTAGCTACAAATGATGTACAAAACAAATTTACGTACACAAGTATGCATTGGAAATTAAGTTCCCAATGAACAAGTTAAGTGCTCTCTAATGCTCTTAACCTTCAACCAAGTTGCCTTTAAATTAAGTAAATTAACG 1200  
ACGF2-GVS5 ..... 1200  
ACGF2-TM1 ..... 1200  
CDS ----- 1

ACGF2-GVS4 TGTTAAAATACAATCAATGTAATATCTAATTTCTCAAAGGAGCCCTAGAAAATGCTTCAATAAAGAATATACTTGTAGAGATCTTCTCGATATTAAATTTATTTAGATCTAATCTCTCAAATAAGAGAATCTTAATCACATCGAG 1350  
ACGF2-GVS5 ..... 1350  
ACGF2-TM1 ..... 1350  
CDS ----- 1

ACGF2-GVS4 AGTATTCACAAAGTTCATGCTAGACTTGATTCTTACCGATCTGTCTTAATAGATTGCAAAAAACCTTCAAGGATATACATTTAAAAGTTCCAACAAATTTAAATTAATAATGGTAATCACATAAGATATCTTACAATATTTTGTAGAT 1500  
ACGF2-GVS5 ..... 1500  
ACGF2-TM1 ..... 1500  
CDS ----- 1

ACGF2-GVS4 GTGGTGTGCCCTCACCCCTTAAGAGACCCTAACAATATATGCATAACATATCTTAAAGTATATATTTGACATTGGATTCCCAAAATTTTCTAAGGTGCTTATCATGAAATGTTTGGTGCTAGGTGTTTGAACATGAAGAATCAA 1650  
ACGF2-GVS5 ..... 1650  
ACGF2-TM1 ..... 1650  
CDS ----- 1

ACGF2-GVS4 GACTCTTTCGAGCTGATTGGGGCTCTTTGTGCATAATAAGTCAATAATTTGATTTTGAACCGAGCAACCGGAAGTGGGACGACTCCCCCAAAACATTATTTAAGAAGGTTCCATAATGTTTCAAAACTAGCAGCTAGCTTCTCTCTG 1800  
ACGF2-GVS5 ..... 1800  
ACGF2-TM1 ..... 1800  
CDS ----- 1

ACGF2-GVS4 TAAGTTTGATTGACGATTTCAATGCCACTGTACACACCAAAAATGAATGATTAACACTAATCTTTGATTTCTTTCCCGAGCTTGTATCCACACTTAGCCAGCTTCGTCAAAATGATGAACGTCGACGACGTCCAAGGTGTTAACGATAACA 1950  
ACGF2-GVS5 ..... 1950  
ACGF2-TM1 ..... 1950  
CDS ----- 40

ACGF2-GVS4 AGGCCGATCACGAAGATATCAACTTCTGGGTTCCGGTTTCATCTACTGATGAAGAGCTCGTAGGGTTTTATCTTAAACGCAAGTTGAAAAGAAACCCCTAAGATTCGAGCTTATCAAACAGATTGATTTACAAATTTGATCCCT 2100

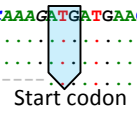



```

ACGF2-TM1 ..... 4050
CDS ..... 960

ACGF2-GVS4 TTTAGAATTTATGATTTTAATTTTTATAGAATTTATGATTCTTTTTATTGGAATTAACAAAATTTTATTAATAATTACTCAAAATGAAGTCATTATATGGTTTTTTTCTAATGGTATACTAAAATTTATTATTAT 4200
ACGF2-GVS5 ..... 4200
ACGF2-TM1 ..... 4200
CDS ..... 960

ACGF2-GVS4 GATTCTATTTGCATGATGGATGTAATTCATCAAAATAATAATTATATTTTTCTACAAAG 4264
ACGF2-GVS5 ..... 4264
ACGF2-TM1 ..... 4264
CDS ..... 960

```

**Figure S7** Alignment of *A* subgenome *CGF2* gene sequences from GVS4 (glanded) and GVS5 (glandless, recessive mutant) near-isogenic lines. Sequence of Texas Marker-1 (TM-1, a widely used genetic standard) is also provided for comparison purpose. The ~4.26 kb sequence of *A CGF2* representing the promoter region (~1.8 kb), 5'-UTR (italics), coding region (including two introns, shown in small case), 3'-UTR (italics), and the terminator is identical between GVS4 and GVS5. Translation initiation codon and stop codon are indicated.

DCGF2-GVS4 ATGAGGTTTCTCCCCFACCTCAGTAGCAACTATAGAAAATATCATTGCTTCTCAATAACAGTCACCTTGATGACAAATTTTATAGGCAAAGATCGACGTATCTTGTAAACAAGCTTTAAGTTGAGTATTCCTCACCAAAGGCAAAA 150  
 DCGF2-GVS5 ..... 150  
 DCGF2-TM1 ..... 150  
 CDS ..... 1

DCGF2-GVS4 ACCTAATTTTAGATGTCATAAAGCTTTCATAGAAATTTAGATAAGGCTTATTGTCATGCATTGTTAAAGTCTCAAACTCTCGTAGTCAGCATTGAAATTTGGAATGCTTCAAAATGGTCCTTTATAAGTAGTTTCAAGAAATAGTCTAAG 300  
 DCGF2-GVS5 ..... 300  
 DCGF2-TM1 ..... 300  
 CDS ..... 1

DCGF2-GVS4 CTTCTCTAGCAAATGATCATTAAAGATATTGACCTAAAATCTTGAGGATCAACTCTAGAGAAAATACCTTAAAGCTTGGAGTTTGCATTGGCCAAATTTCTCATCATCAATTGGTCTAAGTTACTTTAGGTTTGAAGATTTCTCACACTAT 450  
 DCGF2-GVS5 ..... 450  
 DCGF2-TM1 ..... 450  
 CDS ..... 1

DCGF2-GVS4 ATACACTAGTTATTGGTAGCTCCTAACCAGTCAAAATGAGTGTAAAGATTTTTCATCCATGAACCTTGATAAAAGCATCATCCCTTACCTTCTAGTAGGCATAGTTTGTCCATCCAACATGGGGGGACTTGGGACTAATAGTCCCTCCAT 600  
 DCGF2-GVS5 ..... 600  
 DCGF2-TM1 ..... 600  
 CDS ..... 1

DCGF2-GVS4 CTC AATTGCAAATCAATAATAGGATCTCTACTTAGTACCCAAGTGCTAGCTCTGATACATAAATGGAATTTTTGAATTTGCTTGC AATTTTTTCATTCAATTGTAAC TAGATCAAGTGACTAATAGTTATAAAAATGAGAGATGGAC 750  
 DCGF2-GVS5 ..... 750  
 DCGF2-TM1 ..... 750  
 CDS ..... 1

DCGF2-GVS4 AAAAAGAGTTTGGTCTCGTAGTTTGAAAACTTTCTACATTTGCAGAGCTTTACCCAAAGAGTAATCTACAATAATCAATATGTATAAGCGTGATTTAAGTCAACTCACTCACTAAGTTGCAACCTACTCTATACTTCAATCTAGA 900  
 DCGF2-GVS5 ..... 900  
 DCGF2-TM1 ..... 900  
 CDS ..... 1

DCGF2-GVS4 TCACATTTCCCCTAAGTATAACTTAGCTATAAATGATGAATTAACAATTTACTTACACCAAGTATGCATTGGAATTAAGTTTCTCAATGAACAAAGTTAAGTGCTCTCTCATGCTCTTAACTTAAAACAAGTTGCCCTTTAAATTAAG 1050  
 DCGF2-GVS5 ..... 1050  
 DCGF2-TM1 ..... 1050  
 CDS ..... 1

DCGF2-GVS4 TGTAAATAGCGTGTAAAATACAATCAATGTAAATATCTAAATCTTCAAAAGTAGCCCTAGAAAATGCTTCAATAAAGAAATATACTTGCAGAAATCTTCTTGATATTAATTTATTGTAGATCTAATCTCTCAAATAAGAGAACTTCT 1200  
 DCGF2-GVS5 ..... 1200  
 DCGF2-TM1 ..... 1200  
 CDS ..... 1

DCGF2-GVS4 GATCACATCAAGAGTATTCACAAAGTCCATGCTTGACTTGATTCTTGCACTATCTATCCTTACTAATGGATTGCTAAAACCTTCAAGGATATACATTTAAAAGTTCCAACAATTTAATTAAAATATGCTAATCACATAAGATAGCTTA 1350  
 DCGF2-GVS5 ..... 1350  
 DCGF2-TM1 ..... 1350  
 CDS ..... 1

DCGF2-GVS4 CATTAAATTTTTGCTAGATGTGGTGGTCCCTCACATCCTTAAAGAGCCCTAACAAATATGTAGAGCATACTTAAAGTATATATTTGACATTGGATTTCCAAAAATTTCTAAGGTGTCCATTATGATATGTTGGTGTAGGTGTTT 1500  
 DCGF2-GVS5 ..... 1500  
 DCGF2-TM1 ..... 1500  
 CDS ..... 1

DCGF2-GVS4 GAAACATGAAAGAAATCAAGACTTTTCAAGCTGATTGGGGCTTCTTTGTCATAATAAGTCAATAATTTGACTTTGACCCGAGCAACCGGCAAGTGGGACGACTCCCCCTAAACATTATTTAAGAAGGTTCCATAATGTTCAAAGG 1650  
 DCGF2-GVS5 ..... 1650  
 DCGF2-TM1 ..... 1650  
 CDS ..... 1

DCGF2-GVS4 TAGCAGCTAGCTTCTCTCTGTAAGTTTATTGACGATTTTCATGCCACTGTACACACCAAAAATGAATGATTAACACTAATCTTTGATTTCTTCCCGAGCTTGATCCACACTTAGCCAGATTGCTCAAAGATGATGACCGTCGACGACGT 1800  
 DCGF2-GVS5 ..... 1800  
 DCGF2-TM1 ..... 1800  
 CDS ..... 20

DCGF2-GVS4 CCAAGGTGTTAACGATAACAAGGCCGATCAGCAAGATATTC AACTTCTTGGGTTCCGGTTTCATCCTACTGATGAAGAGCTCGTAGGGTTTATCTTAAACGCAAGTTGAAAAGAAACCCCTAAGATTTCGAGCTTATCAAACAGATTGA 1950  
 DCGF2-GVS5 ..... 1950  
 DCGF2-TM1 ..... 1950  
 CDS ..... 170

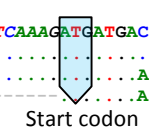



|            |                                    |      |
|------------|------------------------------------|------|
| DCGF2-GVS4 | TATTTACAAATTTGATCCCTGGGATCTCCCAAGt | 2100 |
| DCGF2-GVS5 | .....                              | 2100 |
| DCGF2-TM1  | .....                              | 2100 |
| CDS        | -----                              | 202  |
| DCGF2-GVS4 | ttaaaaatggaaggataaccaaaaccaa       | 2250 |
| DCGF2-GVS5 | .....                              | 2250 |
| DCGF2-TM1  | .....                              | 2250 |
| CDS        | -----                              | 225  |
| DCGF2-GVS4 | GGAGAGAGTGAATCGTACTTCTTCGCAAA      | 2400 |
| DCGF2-GVS5 | .....                              | 2400 |
| DCGF2-TM1  | .....                              | 2400 |
| CDS        | -----                              | 375  |
| DCGF2-GVS4 | TGCATTGGGTTAAAGAAAACCTTAGTGT       | 2550 |
| DCGF2-GVS5 | .....                              | 2550 |
| DCGF2-TM1  | .....                              | 2550 |
| CDS        | -----                              | 525  |
| DCGF2-GVS4 | GAAGCTGtaagtataaaatattgctcaag      | 2700 |
| DCGF2-GVS5 | .....                              | 2700 |
| DCGF2-TM1  | .....                              | 2700 |
| CDS        | -----                              | 532  |
| DCGF2-GVS4 | gcctagcagtttaattagtggttaaat        | 2850 |
| DCGF2-GVS5 | .....                              | 2850 |
| DCGF2-TM1  | .....                              | 2850 |
| CDS        | -----                              | 532  |
| DCGF2-GVS4 | aaatgtaagaggactatttgtttttaa        | 3000 |
| DCGF2-GVS5 | .....                              | 3000 |
| DCGF2-TM1  | .....                              | 3000 |
| CDS        | -----                              | 532  |
| DCGF2-GVS4 | acatthtgaagtthtttgatcgattaga       | 3150 |
| DCGF2-GVS5 | .....                              | 3150 |
| DCGF2-TM1  | .....                              | 3150 |
| CDS        | -----                              | 581  |
| DCGF2-GVS4 | ACACAACAAGATTGGAGACAAATCACAG       | 3300 |
| DCGF2-GVS5 | .....                              | 3300 |
| DCGF2-TM1  | .....                              | 3300 |
| CDS        | -----                              | 731  |
| DCGF2-GVS4 | TCATAACGACGAGGAGAAGCCATCAAC        | 3450 |
| DCGF2-GVS5 | .....                              | 3450 |
| DCGF2-TM1  | .....                              | 3450 |
| CDS        | -----                              | 881  |
| DCGF2-GVS4 | AAATGATGATTTCTTCACTGAGGCCAAT       | 3600 |
| DCGF2-GVS5 | .....                              | 3600 |
| DCGF2-TM1  | .....                              | 3600 |
| CDS        | -----                              | 963  |
| DCGF2-GVS4 | ATTAATAATTAGTTGCTAATTTTATATTA      | 3750 |
| DCGF2-GVS5 | .....                              | 3750 |
| DCGF2-TM1  | .....                              | 3750 |
| CDS        | -----                              | 963  |
| DCGF2-GVS4 | AAATCAATATTTATGAAATTTGAGAATCT      | 3900 |
| DCGF2-GVS5 | .....                              | 3900 |
| DCGF2-TM1  | .....                              | 3900 |
| CDS        | -----                              | 963  |

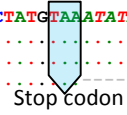

```

DCGF2-GVS4 AGATTCTTTGATTTCAATATTTTTTAGAATTTATGATTTTAGTTTTTTATAGAAATTTATGATTTCTTTTATTGAAATATAATGATACGTAAACATACGAAAACCATTTGTTACG 4023
DCGF2-GVS5 ..... 4023
DCGF2-TM1 ..... 4023
CDS ----- 963

```

**Figure S8** Alignment of D subgenome *CGF2* gene sequences from GVS4 (glanded) and GVS5 (glandless, recessive mutant) near-isogenic lines. Sequence of Texas Marker-1 (TM-1, a widely used genetic standard) is also provided for comparison purpose. The ~4.02 kb sequence of *DCGF2* representing the promoter region (~1.65 kb), 5'-UTR (italics), coding region (including two introns, shown in small case), 3'-UTR (italics), and the terminator is identical between GVS4 and GVS5. Translation initiation codon and stop codon are indicated.

ACGF3-GVS4 ACGAAATAGAAACAAATATTCCTTTTATGAGAGAGAACTGAGCAAATGACTTTGTAAATTAGAAGAAATAGTTGTTAAAGAGAGGTAAAGAAATGTATTGAAAACATTCCTCAAGATCCTCCTATTTATTGCATAAGTGTTCCT 150  
ACGF3-GVS5 ..... 150  
ACGF3-TM1 ..... 150

ACGF3-GVS4 TCTCCCTTCAATATTTGTGATGCCTTACAGAAAAATGATGAATTTCTTTTATGGGGTCAGACATAGATGGAAATAGGAAAAACACTAAGCATCATGGACAAATTTGTGCAAGCCATAGAAGATGTGTTGTATGAGTATCCAAAATTT 300  
ACGF3-GVS5 ..... 300  
ACGF3-TM1 ..... 300

ACGF3-GVS4 AAGATGCTTTAATCTGTTATGCTTGGCAAATAGAGTTGGTGGATTATAAAACAATCCCAATCCTCTTCAAGATCAAATATTCAAAGCTAAATAGTCCCGAATTGTGGGTTCTTGAATCTAGTGAAGGATGATTGTTGAAAACCTTAGA 450  
ACGF3-GVS5 ..... 450  
ACGF3-TM1 ..... 450

ACGF3-GVS4 CCATGTTTAAATGATGTATATCAAGCTCAATTTGTATTGCATATTGTTGGGTTAAGGCTATTGCAAGATTCAACCTTGGAGTTCTCTATTACCACCTTAATATGCAAGATGATAATGAGCTGAGTTGGTGGTTAGGTGTAGCATGGAG 600  
ACGF3-GVS5 ..... 600  
ACGF3-TM1 ..... 600

ACGF3-GVS4 TATATGGACACATAGGAACCAAGTTTATTTAGAATAAAAAAGATCATAACTAGTCCAAATTTGTTCAATTTGAAATTTCTTACATGGAGGCTTGGTAGGGAGCTCACACGACGATGACTCGTATTCAACCTTCCAGGTTAAGTTGTCTTA 750  
ACGF3-GVS5 ..... 750  
ACGF3-TM1 ..... 750

ACGF3-GVS4 CTTCTAAGTAGAGTTGGTGTAAATCGCTAGGTAATGGGTTCAAATTTAACATCGATATGGTTATTTTTATAGAAATGTTGCCACGAGCTGATCGACTATCATTATAATGAAAATGGTGAATTTTGACAAAGGTCGCACAGGTTTATCCA 900  
ACGF3-GVS5 ..... 900  
ACGF3-TM1 ..... 900

ACGF3-GVS4 AGCAACTATGGCTCCAAAAGTTACACATGATTTGTTATTGAAAGGCATTGCTTTAGTTGAAGTCGTTGCAAATTTGAGAGATGATCATTTGAGACGGATTGTTGATTGTACCGAAGATTTAACGAGTAAAAAAGGTTATCTCTATGAT 1050  
ACGF3-GVS5 ..... 1050  
ACGF3-TM1 ..... 1050

ACGF3-GVS4 GGGTTGATTATTGAAGGCTGCTCATGTTGAAAGCTTTTTTTTTTTCAATTTATGTCCTTAAAGTTGAATGAGTAGAAACATTGATTAAGATCGCTCATGCTCTTGCAGGGTAGCTTTATGTCATGCAAATCCTTATGTTTAGAATCT 1200  
ACGF3-GVS5 ..... 1198  
ACGF3-TM1 ..... 1200

ACGF3-GVS4 TCTCCTAGTTGCATGCTTCCATTCTTATTTAAGATGTTCTACTCTTTTATCTAATGAGGAGTCGAGTGTATAGGATAAGCCCAATTAGCTTAAAGAAAATAATTTCCAATCCTTATTTTGGTAAATTTTGTGTTTCATTCCGATTTG 1350  
ACGF3-GVS5 ..... 1348  
ACGF3-TM1 ..... 1350

ACGF3-GVS4 ATAAATACTATTTTCTTCTTCCCTTAAAAAAGGCTAGGAAGAGTTATTGAATAAATAACAAGTTGAAGAGCTAATTTAATAGATTAAACATTTGATCAAATATTAACAACAAGGATGTTAAATGGGAGTTGAGTTGGGGTT 1500  
ACGF3-GVS5 ..... 1498  
ACGF3-TM1 ..... 1500

ACGF3-GVS4 AAAGGTGACACGATAGCTGAATAATTAAACAAAATATGGATGGGAATGGTCTAATATCTAAAAATAGTTAAAAATCATGGGAAATAGAAAAAGACAGATAAAAGATGATCACGAAATCGCCCATAACTGGTGTGAATTAGTTA 1650  
ACGF3-GVS5 ..... 1648  
ACGF3-TM1 ..... 1650

ACGF3-GVS4 AGATCATGAGTGGAGGGGTTAAGACGCCAACAGAACCCGCAACTCCACATCAAATAGAGTAAACCATCCATGCCATAAAGAACAAAAAGAAAGAAAATTCAGACCAGGTCATCATCCCTTATTTGGAGAGAACTGGAACAGGAGAT 1800  
ACGF3-GVS5 ..... 1798  
ACGF3-TM1 ..... 1800

ACGF3-GVS4 TTCCACGTGATAATGATGTCAGAATTTGACTGACAATAGGACCATGAGGTTGATGGTCCCTTTATTTCCCGGAAAAATTACTTTGTTTTCTCCAAAGCACTTCACTTAATAATTATAGTTTTCTCTTTTTCTCATCTGCTCCATGGG 1950  
ACGF3-GVS5 ..... 1948  
ACGF3-TM1 ..... 1950

ACGF3-GVS4 GTTTATAGCCACCTAGTGACGACTTGTATCATCACTCTTTTCCCTTTTATTTATTCCTTCTGCTGCTGAGTCCGCTTGGTTAGTTTTCTTTTTCTCTTTGAAAAACGGTAGTACACACTATCATATTCAATAATGCTTCCTCTTC 2100  
ACGF3-GVS5 ..... 2098  
ACGF3-TM1 ..... 2100

ACGF3-GVS4 TTCGTTCTCTTATTAACCTTAGGTCGAAGATGCCTCACCTACTTTGCACACGCTCCATTTTCATCGTCCAAAGTAGGCCGTAATGGTGGGTATACCTCATTTTCTGGCAAGCTTCAAGGGATGTTGATGGTCGCGTTGTTTGTCTATG 2250  
ACGF3-GVS5 ..... 2248  
ACGF3-TM1 ..... 2250

ACGF3-GVS4 GGGCGATGGCTATTTTCGAGGGACCCGAGATGGTACGGGAAAAATCCATCAATAGGCTGAGCCCTCCAAAATTTGGGGTCCAGTTTCGAGAGGAAAAAGGTCGGGAAAAGATCAGGTGCAAGCTTATTTTAAATGAAGTGTGGACGTGGACCG 2400  
ACGF3-GVS5 ..... 2398  
ACGF3-TM1 ..... 2400

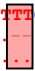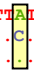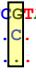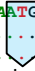

Start codon

|            |                                                                                                                                                         |      |
|------------|---------------------------------------------------------------------------------------------------------------------------------------------------------|------|
| ACGF3-GVS4 | TATGGTAGATGGCGATGTGACTGATTATGAGTGGTACTATACCGTATC                                                                                                        | 2448 |
| ACGF3-GVS5 | .....IGTTGCGGAAAG.....TCGATTTCGAGAACTCCGATATGACTACAAGTAAATTGACCGGAACGAAAAATAAAGTGAACACAAGGATTTACGTGGTTCGGCTTTAA                                         | 2548 |
| ACGF3-TM1  | .....                                                                                                                                                   | 2448 |
| ACGF3-GVS4 | -----                                                                                                                                                   | 2448 |
| ACGF3-GVS5 | TGCCACGTCCACGGGCAGAGGCCAAAAGAAATTTCACTATAACAAGATGAAGATTACAAGTFTTTCACTCAAGACACAACCCGAGAACCTCACAACTCTCAACCCCTATAGAAAACCCGAAAGCTAAAAATCCTAGCTTTCAAAGAAC    | 2698 |
| ACGF3-TM1  | -----                                                                                                                                                   | 2448 |
| ACGF3-GVS4 | -----                                                                                                                                                   | 2448 |
| ACGF3-GVS5 | AAGCTTTGCTCTCTCTTGGTTTGGGATGATGAATATGGCTAATGAACCTCTCTATTTATAAGAGAGTCAAGGACATAATTGTCCAAAACTTTGGCAAAGATTTGGTTGAAAAATGGACACCAACAACCATCCACTAATCCACTACCAC    | 2848 |
| ACGF3-TM1  | -----                                                                                                                                                   | 2448 |
| ACGF3-GVS4 | -----                                                                                                                                                   | 2448 |
| ACGF3-GVS5 | CAACAACCCACTACCAACAACAACATCCACTACCAATTTTAAAGCCATTTCTTAACAAATCTCCACCTTGGCTTGAAATTTACCAAGCTGAACATCATAGTGAATTCCTCGAAGCTGGATCACCTCTTCCAACGCCTCTCTGGCGCTAAT  | 2998 |
| ACGF3-TM1  | -----                                                                                                                                                   | 2448 |
| ACGF3-GVS4 | -----                                                                                                                                                   | 2448 |
| ACGF3-GVS5 | CAATCCCGAATACCTATCAAGTCCAAGCAATGCTTGAACCTTATATGCAGGGATCACCTTAGTTAACATATCTGCAGGATTCCTCTCGGTAGCAACCTTGCTGATAACAATGTCACTTGCCTAACATGTTCCCGAACAAAATGATATCTG  | 3148 |
| ACGF3-TM1  | -----                                                                                                                                                   | 2448 |
| ACGF3-GVS4 | -----                                                                                                                                                   | 2448 |
| ACGF3-GVS5 | AACATCAATGTTTGGTCCGTTCAAGCAATCTGATTTTTAGTCAAGTGTATGGCACTCTGGCTATCGAAAAACAACAGTGAATCCCTGTTGTAAACCCAACTGCTTACTAGACCTTTCACCAATGCTTCTTTCACCTGCTTCT          | 3298 |
| ACGF3-TM1  | -----                                                                                                                                                   | 2448 |
| ACGF3-GVS4 | -----                                                                                                                                                   | 2448 |
| ACGF3-GVS5 | GCTAACGCCATATATTCGCCCTCAGTCGTAGATAAGGCTACGGTAGACTGTAACACAGCTTCCAACTAATGGCTCCTCCAGAATAAGTGAACAATAACCCGTCAGAGATCTTCTTTTGTCCAGATCTCCAGCATAAATCAGAGTCCACA   | 3448 |
| ACGF3-TM1  | -----                                                                                                                                                   | 2448 |
| ACGF3-GVS4 | -----                                                                                                                                                   | 2448 |
| ACGF3-GVS5 | TAGCCCGTGACACTGCTAGTGCAGTCACTCTGATCATATACCAAGCATAAATCTGCAGAACCTCTCAAGTACCTGAGAAATCCATTTACGGCCTGCCAGTGTCTTCTGCCAGGACAACTCATGTATCTGCTGACCACACTAACTGCATGT  | 3598 |
| ACGF3-TM1  | -----                                                                                                                                                   | 2448 |
| ACGF3-GVS4 | -----                                                                                                                                                   | 2448 |
| ACGF3-GVS5 | GAAATGCTTGGACGAGTGCAAAACATTCATACATCAACGCTTCCAACCTGCACTCGAGTATGGAATGTGAGACATTTGCTGCTTTTCTTCATCAGATTGTGGTGACAACTCTGCAGAGAGTTTGAATGTGGTGCCAAACGGAGTACTCACA | 3748 |
| ACGF3-TM1  | -----                                                                                                                                                   | 2448 |
| ACGF3-GVS4 | -----                                                                                                                                                   | 2448 |
| ACGF3-GVS5 | GTTTTCGCTTTATCCATGCCGAAGCGTTGAAGAACCTTTTCAATGTAGTTCTTCTGCACACACGAAGCTTGCCCGCTTTCGATCTCTGTGAATATCCATGCCAAAATTTTCTTGGCAGCACCCAGATCCTTCATCTCGAATCACCAC     | 3898 |
| ACGF3-TM1  | -----                                                                                                                                                   | 2448 |
| ACGF3-GVS4 | -----                                                                                                                                                   | 2448 |
| ACGF3-GVS5 | CTCAACTGCGACTTTAACTTGTGATTTCCGACATGTTTTTGAAGCAATTAACATGTCATCAACATACAGCAACAAATAAATGTGCGAACCATCTGAGAGCTTCGGATGATAGACACAAGCATCATAGTACATCTTGTGTAACCATGC     | 4048 |
| ACGF3-TM1  | -----                                                                                                                                                   | 2448 |
| ACGF3-GVS4 | -----                                                                                                                                                   | 2448 |
| ACGF3-GVS5 | TGAATCATGAAGCTATCAAAACCGCTTGTACCCTGCCCTGGGGATGTTTCAATCCATATAAAGACTTCTTTAATAGACAGACATGGTCTTCTTTACCAGGAAGTGTAAAACCTCTGGTTGACGCATGTAGATTGTTTCTCGAGCTCA     | 4198 |
| ACGF3-TM1  | -----                                                                                                                                                   | 2448 |
| ACGF3-GVS4 | -----                                                                                                                                                   | 2448 |
| ACGF3-GVS5 | CCATGCAAGAACCGCTTTTACGTCAAGCTGCTCAAGTCTAGATCAGACTTGGCCACCATGGCAAGTAATACACGAATGGAAGAAATGCTTTACGACTGGGGAGAAAACCTCATGTTAGTCAATCCCCTCTTTCTGAGTGAAGCCTTTA    | 4348 |
| ACGF3-TM1  | -----                                                                                                                                                   | 2448 |
| ACGF3-GVS4 | -----                                                                                                                                                   | 2448 |
| ACGF3-GVS5 | GCAACCAATCGTGCCTTGAATCTAGTTGCTTCAACCCCTAGGATGCCCTCTTTCTTGAAGACCCATTTGCAACCAACTATCTTCTGGTTACTTGGCGGTTAACCAACTCCCAAGTATGGTTCTTGTGAAGAGATTCATCTCCTCA       | 4498 |
| ACGF3-TM1  | -----                                                                                                                                                   | 2448 |
| ACGF3-GVS4 | -----                                                                                                                                                   | 2448 |
| ACGF3-GVS5 | CTCATAGCAATTGCCACTGTGCCATTATCACAGTGCAGCCCTATTATAACTGGAAGGTTCTATACCAATGGACTCCGCCACACTGAGCGCGAAAGACACCAGATTAGCGTAAACCGGATTTGGTTTGAATTTGCTCTTCGTTCTT       | 4648 |
| ACGF3-TM1  | -----                                                                                                                                                   | 2448 |
| ACGF3-GVS4 | -----                                                                                                                                                   | 2448 |
| ACGF3-GVS5 | CCAGTGGCAATGCTATATGGTTTTCTTGAAGTACTCATCTTCAATCGGAATCTGCACCTCAACTTGGATCATCTGGACTGAAGTACCTTCGGTAGGAAATGGAGCTCCACCTGACACTCCACCTGCTTCTCAACACCGTGAATCTCC     | 4798 |
| ACGF3-TM1  | -----                                                                                                                                                   | 2448 |

ACGF3-GVS4 ----- 2448  
ACGF3-GVS5 ATTCATCTGACTCCTCCTTTCCCGGAAATTGTGGTGGATCGAAGCATGGATGACTCATCAAAGTCACATCTCTGCTGATGATGAAC TTGGACGAAACCGGATCAGGACACCACACCTGTATCCTTTACCCCTTGGCCGATCCA 4948  
ACGF3-TM1 ----- 2448

ACGF3-GVS4 ----- 2448  
ACGF3-GVS5 AGAAAATATGCATTTCTTCGCCCTCGGTTTGAGTTTCCCTCATTACATGAGCATACGCAGGGCAGCCAAACACTCTTAAACCAGAGTAAFCAGCAGGAGAACCCAGACCACTTCCCTCAGGAGTCTTCAGCTCAATAGCTGTTGATGGA 5098  
ACGF3-TM1 ----- 2448

ACGF3-GVS4 ----- 2448  
ACGF3-GVS5 GATCTGTAAACCAATAACAAGCAGTATAACAGCTTCAGCCAAAATTCCTCACCGAGCCAGCATTGATCGCATGCAACGAGCTCGTCCAAGAGAGTTCATTTATGCGTTCTGCAACTCCATTTTGTGTGGTGTTCGACGAACA 5248  
ACGF3-TM1 ----- 2448

ACGF3-GVS4 ----- 2448  
ACGF3-GVS5 GTGCGGTGCTCACTATTCCCTCATTTTTGCAGAACTCATTGAATTCACCTGAGCAAACTCCAAGCCATTATCCGTCGGAAATCGCTTGATCTTCTTTCCGTTTGAATTTTCGATCAAAGCTTTAAATTGCTTGAAGTTGATGAGAACC 5398  
ACGF3-TM1 ----- 2448

ACGF3-GVS4 ----- 2448  
ACGF3-GVS5 TCATACTTGTCTCTTCAGAAAATACCCCAAACCTTTCGAGTAATCATCGATAAAGGTAAGCAGATATCTGTAACCACCTTTAGAAATGTTCGGAGAAAGCCCCAAAGGTCAGAAATGGAAGTAATCCACTGTCCCTTTGTCTTGTA 5548  
ACGF3-TM1 ----- 2448

ACGF3-GVS4 ----- 2448  
ACGF3-GVS5 ATCCCAGTGTGAACCTTTACCCGAGTCTGCTTACCAGAGACGCAGTGTCTCAGAAAATCAACTTTCCCTGTACACTGCCAGACAATTAATCCTCGTTTGTCTTAGCACCAGATAAGCCTCTCTCGCTCATATGCCCGAGCCGATATGCCAT 5698  
ACGF3-TM1 ----- 2448

ACGF3-GVS4 ----- 2448  
ACGF3-GVS5 AAC TTCGTGGTGCAGAACTTAGATCATCTGATGATGACACTCCCGCAACACCTGTAACCGAGGAACCATCGAGGAAGTAAAGGCCCGCTCCAAATTACCAGTATCACAGTCAAAGCACCCGAGAAATACCTTGAGAACTCCACCTTCA 5848  
ACGF3-TM1 ----- 2448

ACGF3-GVS4 ----- 2448  
ACGF3-GVS5 GCAGAGTACCAGAAAGCCCTTCTTGTCACACTCAAGAGATCAAAATTTTCTTCATTTCTGGAATGTGCCAATCATCAGTTAGAGTTCTAAACAATACCGTCAAACATCTTTATACGAATGTGCCAATCCCCATGACTTGACATGCG 5998  
ACGF3-TM1 ----- 2448

ACGF3-GVS4 ----- 2448  
ACGF3-GVS5 TGGTCATTTCCCAATTAGTACTGAAACCAGAAATGCTTCTCGTATGTTGAGAAATGCATCTTTGGAAGTACTTATATGAAATGTAGCTCCCGTATCAAGAAATCCATCTCCCACCAGCGTAAGAGTCGGATACTGCAAGAACGATCTCGGCATCA 6148  
ACGF3-TM1 ----- 2448

ACGF3-GVS4 ----- 2448  
ACGF3-GVS5 CTTGAAGAACTGCATCAGCTACACTTCGCAGCATATTTTGTGCTCCTGTGATCTGATTTCTCCCTTTTCGGACAATCTACCTTCATGTGCCGTACTTCTTACAGTAGTAGCACTGTATTTCTTTCTTGGACTGCGATCTAGGA 6298  
ACGF3-TM1 ----- 2448

ACGF3-GVS4 ----- 2448  
ACGF3-GVS5 TGGCTTTTACTTGAACCTTCCACCCCTTGGCTTGGATCTCCCTCGAGCAACCAAGCCTTCGCCTTCAATGTTTTCGACCACCTTACCAGTGAATTTCTTCCCAACTCACTGGAACCTTAAGGCATTTTTACCTCCTCTAGAGTCAGGTCA 6448  
ACGF3-TM1 ----- 2448

ACGF3-GVS4 ----- 2448  
ACGF3-GVS5 TCACGACCGTACATCATTGTATCAACAAAATTCCTCATACGAGGGAGGCAAGAAACACAAAACAAATTAATGCTTGGTCCCTCATCATCGATTTTGTATCGATATTAATCAAATCCATGATAATGGAATGAATTAATCCAGGTGCTGGAA 6598  
ACGF3-TM1 ----- 2448

ACGF3-GVS4 ----- 2448  
ACGF3-GVS5 ACAGGTGTACCTTCTCCATCTTCAGGGCATAGAGTCTTTGCTTGAGGTAGAGCCGGTTCGTCAATGACTTCGTGATGACTTGTCTCTTAAACCAGGACCAAAACCAGGACCGGTTTCTCATCCGCTACTTCTCGTAGCACTTCATCT 6748  
ACGF3-TM1 ----- 2448

ACGF3-GVS4 ----- 2448  
ACGF3-GVS5 CCTAGACATAGCAGAAATAGCAGTATGTGCTCTTTAGCATGTCATCCTTTTGTCTTCCGAAAGCGTGTGGTAATTTATCTTTACCAGACAATGCTTTTAGCAATCCCTTGTGAACCAGCACTGCCCGCATCTTGATGCGCCATAAA 6898  
ACGF3-TM1 ----- 2448

ACGF3-GVS4 ----- 2448  
ACGF3-GVS5 CTGAAACTATTTTTCCCGGTAAATTTCTCGACATCATCTTAGTTCGATGAAACACTTGTAGCCATAAATTTGGAACCTTTGAATGAATGATAATAATTTCTTCTGATGTGAAGATCAGACAAAGCTGCAGTCAAGGGCAATTCAGAAA 7048  
ACGF3-TM1 ----- 2448

ACGF3-GVS4 ----- 2448  
ACGF3-GVS5 ATAATTATCACCTTCAACTACGCTCTGATACCAATTTGTTGCGGAAAGGATCGATTGAGAACTCCGATATGACTACAAGTAAATTTGACCAGGAAACGAAAAATAAAGTGAACACAGGATTTACGTGGTTCGGCTTTAATGCCTACGCTCC 7198  
ACGF3-TM1 ----- 2448



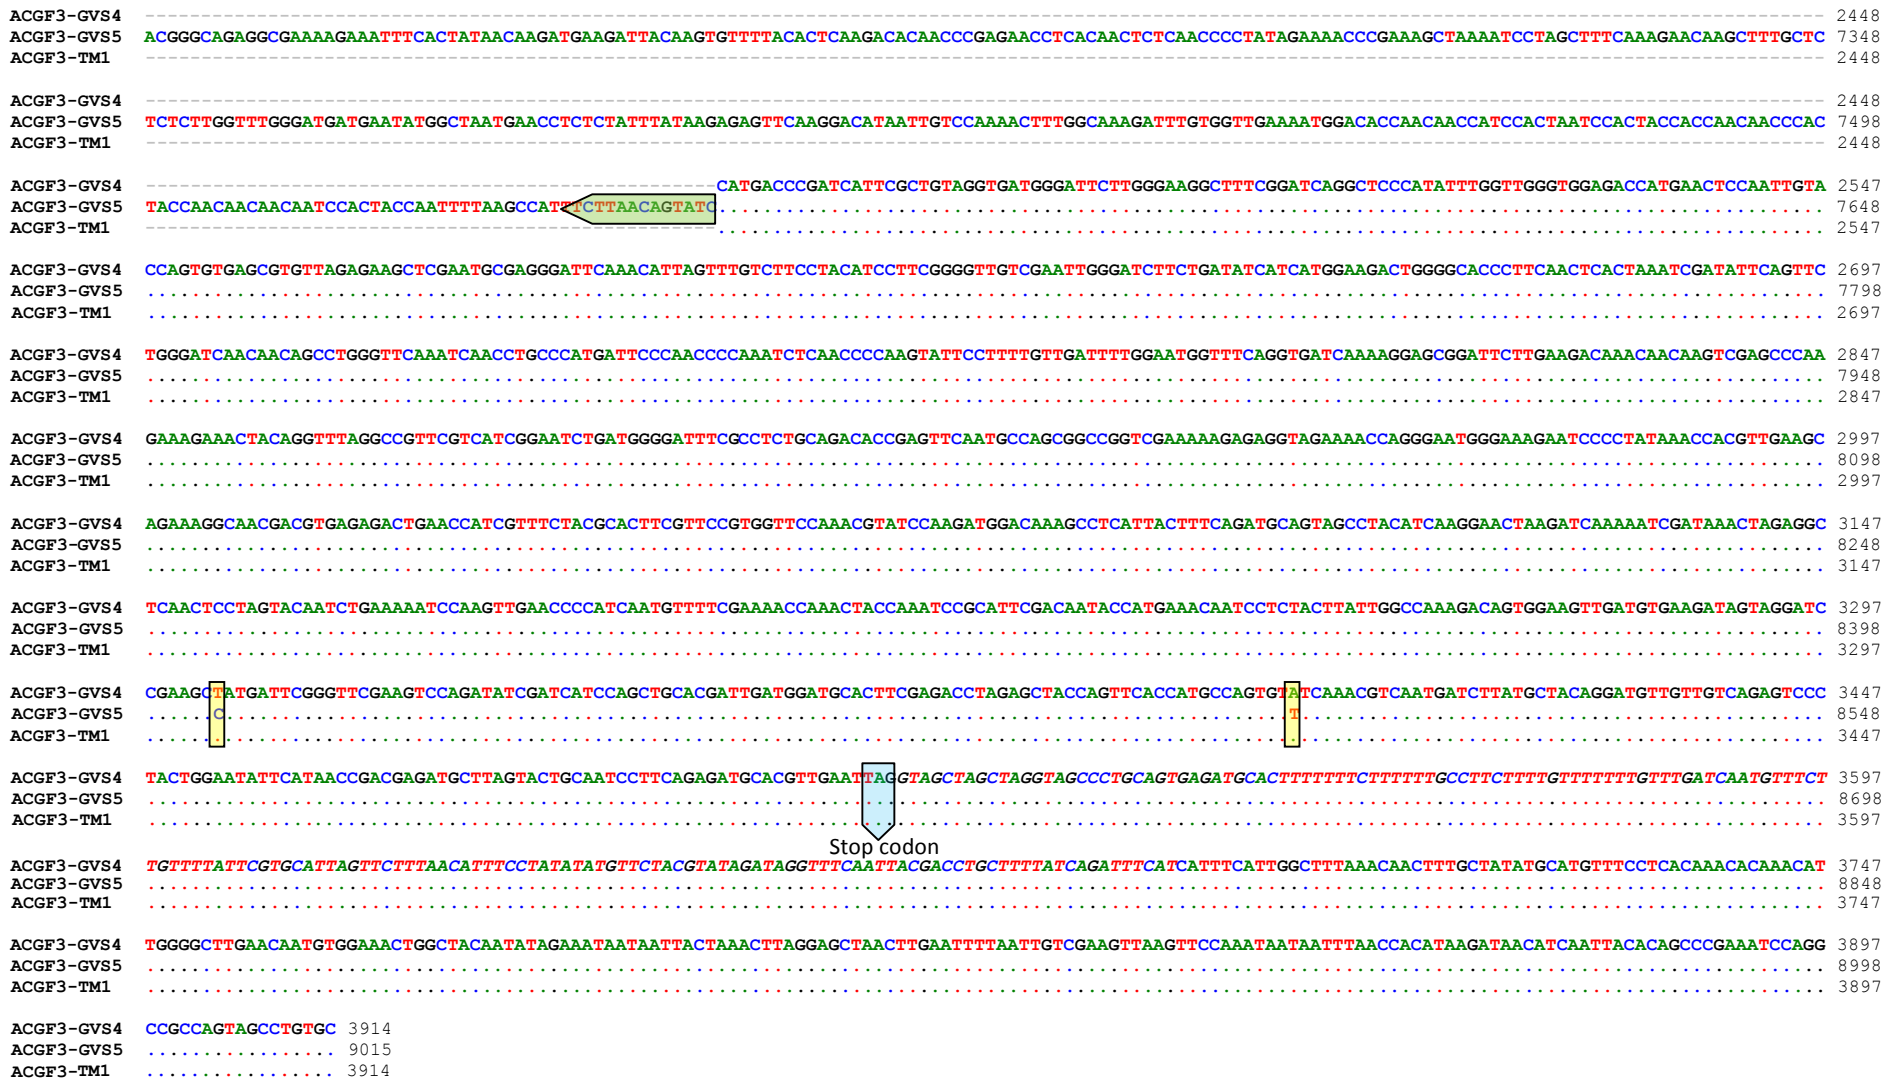

**Figure S9** Alignment of A subgenome *GoPGF* (synonym *CGF3*) gene sequences from GVS4 (glanded) and GVS5 (glandless, recessive mutant) near-isogenic lines. Sequence of Texas Marker-1 (TM-1, a widely used genetic standard) is also provided for comparison purpose. The ~1.95 kb sequence upstream of the start codon, representing the promoter region of *A CGF3* in the glandless GVS5, has 2 SNPs (yellow box) and one deletion (2 bp long; red box) compared to the glanded GVS4. In addition, this homeolog in the GVS5 has two SNPs and a ~5.1 kb transposon insertion (indicated with two opposing green arrows) in the coding sequence. 5'-UTR and 3'-UTR are shown in italics. Translation initiation codon and stop codon are indicated.

DCGF3-GVS4 CTTCCCTATAACACCCCAATCCACGTAGGTCAACTGAAGTGTACACATATAGAAAAAGACATGCATAAATTTGATTTTTAGTTCAACTTAAATACATATTAACCTAACTAGGTGACCTCAGAAAACCTCTACAAAACACAGTTTATTT 150  
 DCGF3-GVS5 ..... 150  
 DCGF3-TM1 ..... 150

DCGF3-GVS4 AAAAAATATACCCATAGAAATAAAGTAAATGGATTAAATATTTTCGATGAAATACCTCCCTTGAATAAAATCTAATGGTAACTATTACTTTATAAAACATTCCTGGTGATACAAGTAGAAATAAATTTCTAAATGAGAACTTAACTAA 300  
 DCGF3-GVS5 ..... 300  
 DCGF3-TM1 ..... 300

DCGF3-GVS4 CTTTAAACAAATCCCTCAAGGGGTACATTCCTTATAAAGATGTAATTGAATGAGAAAGCTATTTATTATAGATTAATAATTTAGAAAATTTTAAACATGCCGCCCCAAAACATATGCATGTTACAAAAAAAACAAATGAAGCCCTACTGT 447  
 DCGF3-GVS5 ..... 450  
 DCGF3-TM1 ..... 447

DCGF3-GVS4 AGAGAATGCTTCCTTTGGCTTAGTCCCTTCAGAAAGCCCAATAACAAAGATCACCTGGAAGGAAGGAAAGAAAATGGGTAAAGTTTAAAAATAACTTAGTAACTCCACAAGGAAAACCAACACTTAAATAAGAACAGATTACACTACAA 597  
 DCGF3-GVS5 ..... 600  
 DCGF3-TM1 ..... 597

DCGF3-GVS4 GTTCATAACACAGACTAATACATTAGACTCTATACGCTGAGACATATGGGCGTATACCTTATCTCATTTGGCGAACACTTAACCTTGGCGTATAACCTTTGAGCATACCCACATATATAGAGCATACCCTTTTCATGAAATGGGCAT 747  
 DCGF3-GVS5 ..... 750  
 DCGF3-TM1 ..... 747

DCGF3-GVS4 ACACCTATATCCTTTCCCTACATAGCACTAAAACCTAAACAGAAATGATGCTTCTGCGTTAACATAACTTTTTTTCATAAGTACTTTTGATCACAACTCTCTTTAGGTGAAGCTACACTTACTTTCAAACCTTATTAGGGCGAGTTC 897  
 DCGF3-GVS5 ..... 899  
 DCGF3-TM1 ..... 897

DCGF3-GVS4 AATATATCCCTCATCTTTCTAATGAATACATTATGATCTCGATACGTCATAGGAATCAACATACTTCCCTAATTTATTAATCATCTCTTTTCATCTCAACTGATATATGCATCACACAAACATACACAATATCGTATTAGCTTATCC 1047  
 DCGF3-GVS5 ..... 1049  
 DCGF3-TM1 ..... 1047

DCGF3-GVS4 TTTCAATACAAAATATCTTTATAACAAATACAGAGACAAATGCTTACTACTTCAAAACCTTCCCTTAGGTTGACCTCGAATTTTACATATCAGAACAGATCTTTTGTATCATATCTTTCGAACACCTATGTATTCTTGTGAGTTTCA 1197  
 DCGF3-GVS5 ..... 1199  
 DCGF3-TM1 ..... 1197

DCGF3-GVS4 GGCTATTTGCTATGGTTAACAACTAACATGCTTATAGTAGGCAGCACCATAACGTTAGGCTAGTTAGCACTAGTATGCCCTACCAAACCTAACACCCACCAACTTGTAGTAACTAACATACCCCAACATGGTCGCCAACTA 1347  
 DCGF3-GVS5 ..... 1349  
 DCGF3-TM1 ..... 1347

DCGF3-GVS4 TTTAACAACTAACATGCTTACTAGTGGCCATCATATATCCCTATCTGGTTAGCAATTAACATGCCCTACCAGTGGTCACACATTTCTGCCATTTAGTTTGAATTAACATGCCCTACCAGTGGCTCATCTTATCCGGATATTGAGTT 1497  
 DCGF3-GVS5 ..... 1450  
 DCGF3-TM1 ..... 1497

DCGF3-GVS4 CATATCCGTAAGGAAGTCATTTCATATCATGCCACGATTATGCATATATAACACAGGCAATTAACATAAAATAGAACACAACTAGAAAAGAATCACATGGTCTGGATCCCTCATAGATGATTTTAAAGAAAATGTTATTTTATCACTACT 1647  
 DCGF3-GVS5 ..... 1600  
 DCGF3-TM1 ..... 1647

DCGF3-GVS4 ACCGCATGCACACCTCTTCTTTCTTTTGTAACTTGTACTTTTTTCCCAGAACTCCTCTTAAACAAGATTTCAAAGTATAACATAGCAAAAAGAAAGAGAAAGAAAACCCCACTACAAAGTTTTCACCTGATATTTATATCTCACA 1797  
 DCGF3-GVS5 ..... 1750  
 DCGF3-TM1 ..... 1797

DCGF3-GVS4 GCTTCCTCACCTTAGGATAAATATGGCTAACATGCAAGGCTAACTCAATCTATCCTAACCAACATAATTTATAGGTCATTATACATAAAAAAAATAATCATAAAACCTTTGGTATTTCTAATTTGGATCCCAATTAAGCACAACTAG 1946  
 DCGF3-GVS5 ..... 1900  
 DCGF3-TM1 ..... 1946

DCGF3-GVS4 AACTGAATAGAAATACATGTCACAAACAAACAAATTTTACATCCCAATCCCAACATCCTTTACTGGCTTACATAAAGAGAAGGCTTAAACACACAACTTTTCAAAGAAAACACTGATTTGGCGGTTCTTTAAAGTAACCCAGCCAAA 2096  
 DCGF3-GVS5 ..... 2050  
 DCGF3-TM1 ..... 2096

DCGF3-GVS4 ACAACTTAGACTTACCCAAAATACAAATCTTAAACAGGCTTACCTATAAATATACAGTCTGCCACACACAGCGTACAACATATACAATTAACCACTCTGACGAATAAACAATAAATCAGTCTTACCTTACCTTAAATCTTAGCTAATTTT 2246  
 DCGF3-GVS5 ..... 2200  
 DCGF3-TM1 ..... 2246

DCGF3-GVS4 AGCACATACAAACCATCAACAAAGACTACGTTGGACAGGGTATTACATCCCTCTTTATTGGACGAAATAAGAAAACAAATATCTCTTTTCTGAGAGAGAAATTTGGCAAATGACTTTGTAATTAAGGAATAAGTTGTTGAAAGAGGTA 2396  
 DCGF3-GVS5 ..... 2350  
 DCGF3-TM1 ..... 2396

DCGF3-GVS4 AAGAAATGTTATTGAAAACCTATTGCTCAGGATCTCCATTTTATTGTCATAAGTGTCTTCTTTTCTTTTCAACATTTGATGCCTTACAGAAAATGATGAATTTCTTTGATGGGTCAGACATAGATGGTAAATAAGAAAACACACTA 2546  
 DCGF3-GVS5 ..... 2500  
 DCGF3-TM1 ..... 2546

DCGF3-GVS4 AGCATCATGGGAAAATTGTGCAAGCCTTAGAAGATGTTGTATGAGTTCCAAAATTTAAGATGCTTTAATCTGTTATGCTTGGCAAATAGCGTTGATGGATTATAAACAAATCCCAATCCTCTTCCGAGTCAAATATTCAAAGCTAA 2696  
 DCGF3-GVS5 ..... 2650  
 DCGF3-TM1 ..... 2696

DCGF3-GVS4 ATAGTCCCGAATTGTAGGTTCTTGAATCTAGTGAAGGATTGATTTGTTGAGACTTAGACCATGTTTTAATGATGTATAGCAAAGCTTAATTTGTATGTCATGTTGTTGGGTTAAGGCCAATGCAAGATTCAACCCGTAGTTCTTTG 2846  
 DCGF3-GVS5 ..... 2800  
 DCGF3-TM1 ..... 2846

DCGF3-GVS4 CTACTACCTTAATATGCAAGACGCTAATGAGCTGAGTTGGTATTTAAGTGTAGCATGAAAGCATATGGACACATGSAACCGATTATTTGGAATAAAAAAGATGACAAATGAGTTTAAATGTTCAATTTCAATATTCTTACACGAGGC 2996  
 DCGF3-GVS5 ..... 2950  
 DCGF3-TM1 ..... 2996

DCGF3-GVS4 TTGGTAGGGAGCTCACACGACGATGACTCGTTCACCTACCAGGTTAAGTGTCTACTTCTAAGTAGTGTGGTGC AAAATTGCTAGGTAATAGGTTCAAATGTAACACCGATATGGTTATTTTTATAAGAAATGTTGTACCGAGCTAA 3146  
 DCGF3-GVS5 ..... 3100  
 DCGF3-TM1 ..... 3146

DCGF3-GVS4 TCGGCTATCATTCAATGAGAATGGTGATTTTGACAAAGGTCGCACAGGTTTTATCCAAGCAACTATGACTCTAGAAGTTATAAATGATTGTTGTTTGTAGAGGCATTGCTTTAGTTGAAGTCGTTGCAAATGAGAGAGTGATCATTGA 3296  
 DCGF3-GVS5 ..... 3250  
 DCGF3-TM1 ..... 3296

DCGF3-GVS4 GACGAATTGTTGATTTAGCGCAAGACTTAACGAGTAAAAGCAAGGTTATCTCTATGGTGGGTTTGATTATTGAAGACTGCTCATGTTGAATGAGTTGGATTAGTAGAAACATTGATAAGACCGCTCATGCTCCTGCTGTTGCAAGGG 3446  
 DCGF3-GVS5 ..... 3400  
 DCGF3-TM1 ..... 3446

DCGF3-GVS4 TAGCTTTATGTCATGCAAATCCTTATGTTTGAATCTTCTCTTAGTTGCATGCTTCCATTCTTATTAAAGATGTTCCACTTTTTTATCTAATGAGTGTATAGTATAAGCCATTAGCTTAAGAAATTAATTTTCCAAATCCTTATTTTG 3596  
 DCGF3-GVS5 ..... 3550  
 DCGF3-TM1 ..... 3596

DCGF3-GVS4 GGTGGCTTTGTTTGTTCCTTCGATTGGTAATAACTATTTTTCTTCTTCCTCGAAAAACAAGGCAGGGAGAGTTATTTGAATAAATTAACAAGTTGAAGAGCTAATTAATAGATTAACATTTGTACCAATATTAACA 3746  
 DCGF3-GVS5 ..... 3700  
 DCGF3-TM1 ..... 3746

DCGF3-GVS4 GGTAGTTAATTGGGAGTTGAGTTGGGTTAAGGTGACACGATAAGCAGAAATAATTAACAAAATATGGATGGGAATGGTCCATAATCTAAAAATAGTTAAGAATCGTGGGAAATAGAAAAAGACAAATAAAGATGATCAGAAATCGC 3896  
 DCGF3-GVS5 ..... 3850  
 DCGF3-TM1 ..... 3896

DCGF3-GVS4 CCCGTAATAACTGGTGTGAATTAAGTTAAATCATGAGTGGAGGGGTTAAGACGCCAACAGAAGCATCGCAACTCCACATCAAATAGAGTAAACCATCCATGCGATAAAGAACAAAAAGAAAGAAAATTCAGACCGGTCATCATCCT 4046  
 DCGF3-GVS5 ..... 4000  
 DCGF3-TM1 ..... 4046

DCGF3-GVS4 TATTTGGAGAGAACTGGAAACAGGAGATTTCCACGTGATAATGATGTCAAGATTTGACTGACAAATAGGACCATGAGGTTGATGGTCCCTTTATTTCCCGGAAAAATTATACTTTGTCTTCCAAAGCACTTCACTTATTAATTATGTTT 4196  
 DCGF3-GVS5 ..... 4150  
 DCGF3-TM1 ..... 4196

DCGF3-GVS4 TCCTCTTTTTCTCAGCT ..... GCTCCATGGGGTTTATAGCCACCTAGTGACGACTTTGATCATCACTCTTTTT 4266  
 DCGF3-GVS5 ..... 4220  
 DCGF3-TM1 ..... N. TTATTTCCCGGAAAAATTATACTTTGTCTTCCAAAGCACTTCACTTAATAATTATAGTTTTCTCTTTTTCTCATCT 4346

DCGF3-GVS4 CCTCTTATTTATCTTCTGCTGCTGAGTCCGCTTTGGTTACTTTTTCTTTTTCTCTTTGAAAAACAGTAGTACACACTATCATATTC AATGCTTCCCTCTTCTCGCTTCTCTTATTACCTTAGGTC AAGATGCCTCACCAC 4416  
 DCGF3-GVS5 ..... 4370  
 DCGF3-TM1 ..... G. G. Start codon T. 4496

DCGF3-GVS4 TTTGCAACAACGCCATTCATCGTCCAAAGTAGGCTGAATGGTGGGTATACTCCATTTCTGGCAAGCTTCAAGGGATGTTGATGGTCCGCTTGTTTTGTATGGGCGATGGCTATTTTCGAGGGACCCGAGATGGTACGGGAAA 4566  
 DCGF3-GVS5 ..... 4520  
 DCGF3-TM1 ..... 4646

DCGF3-GVS4 ATCCATCAATAGGCTGAGCCCTTCCAAATGGGGTCCAGTTTCGAGAGGAAAAGGTCGGGAAAAGATCAGGTGCAAGCTTATTTTAATGAAGTATGGACGTGGACCGAATGGTAGATGGCGATGTGACTGATTATGAGTGGTACTATAC 4716  
 DCGF3-GVS5 ..... 4670  
 DCGF3-TM1 ..... T. 4796

DCGF3-GVS4 CGTATCCATGACCCGATCATTGCTGTAGGTGACGGGATTTGGGAAGGCTTTCGGATCAGGCTCCATATTTGGTTGGTGGAGACCATGAACCTCAATGTTACCAATGTGAGCGTGTAGAGAAGCTCGAATCGAGGGATTC AAAC 4866  
 DCGF3-GVS5 ..... 4820  
 DCGF3-TM1 ..... T. G. 4946

DCGF3-GVS4 ATTAGTTTGTCTCTACATCCTTCGGGGTTGTCAAATGGGATCTTCTGATATCATCATGGAAGACTGGGGCACCCCTCAACTCACTAAATCGATATTCAGTTCTGGGATCAACAACAGCCTGGGTTCAAATCAACCTGCCATGATTC 5016  
 DCGF3-GVS5 ..... 4970  
 DCGF3-TM1 ..... 5096

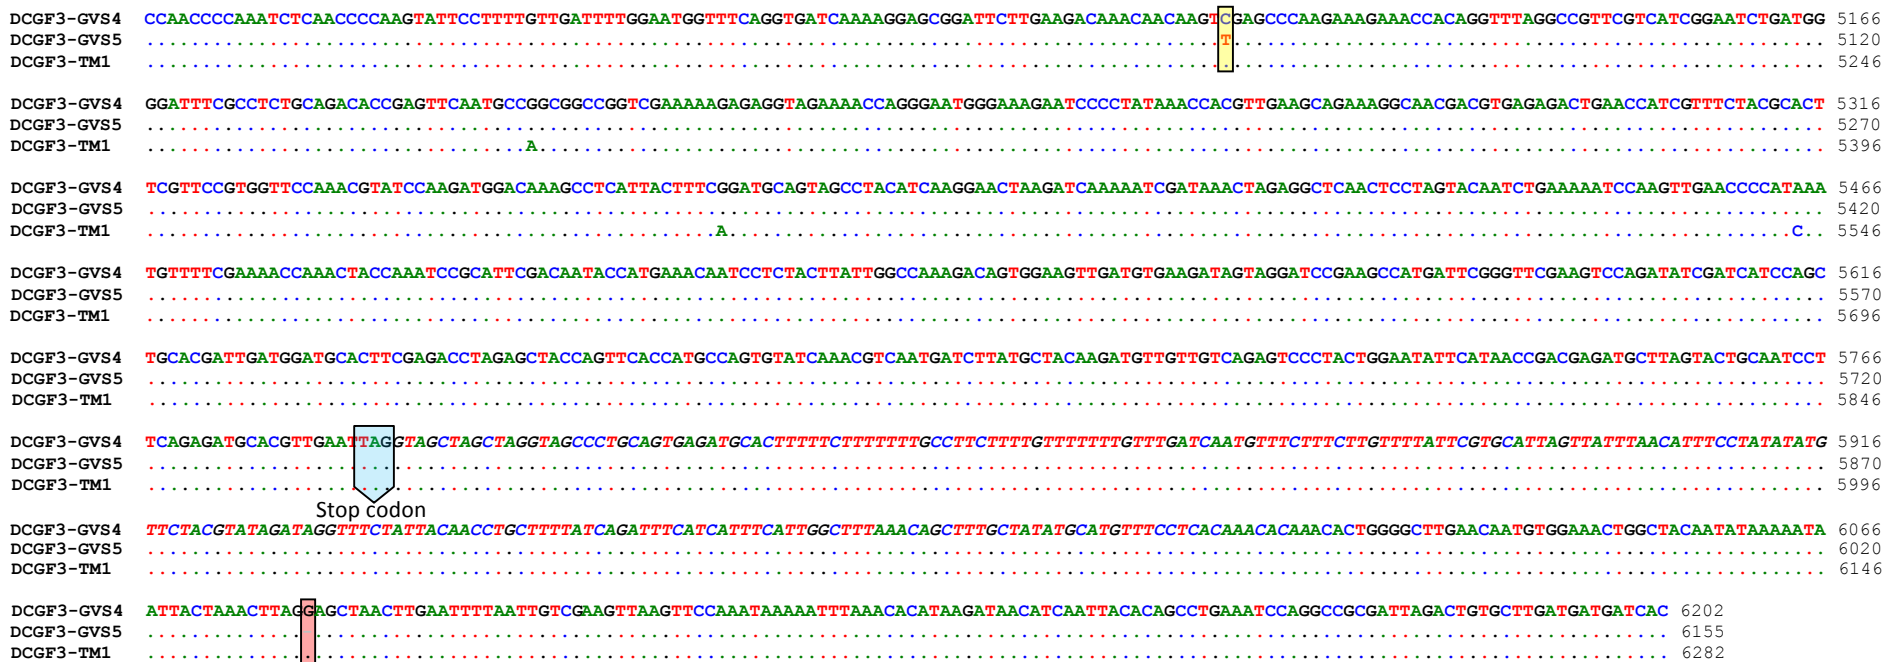

**Figure S10** Alignment of D subgenome *GoPGF* (synonym *CGF3*) gene sequences from GVS4 (glanded) and GVS5 (glandless, recessive mutant) near-isogenic lines. Sequence of Texas Marker-1 (TM-1, a widely used genetic standard) is also provided for comparison purpose. The ~4.2 kb sequence upstream of the start codon, representing the promoter region of *D CGF3* in the glandless GVS5, has 15 SNPs (yellow box), two deletions (1 and 49 bp long; red box), and two insertions (1 and 3 bp; green box) compared to the glanded GVS4. In addition, the GVS5 has two SNPs in the coding sequence and one base pair deletion in the terminator. 5'-UTR and 3'-UTR are shown in italics. Translation initiation codon and stop codon are indicated.

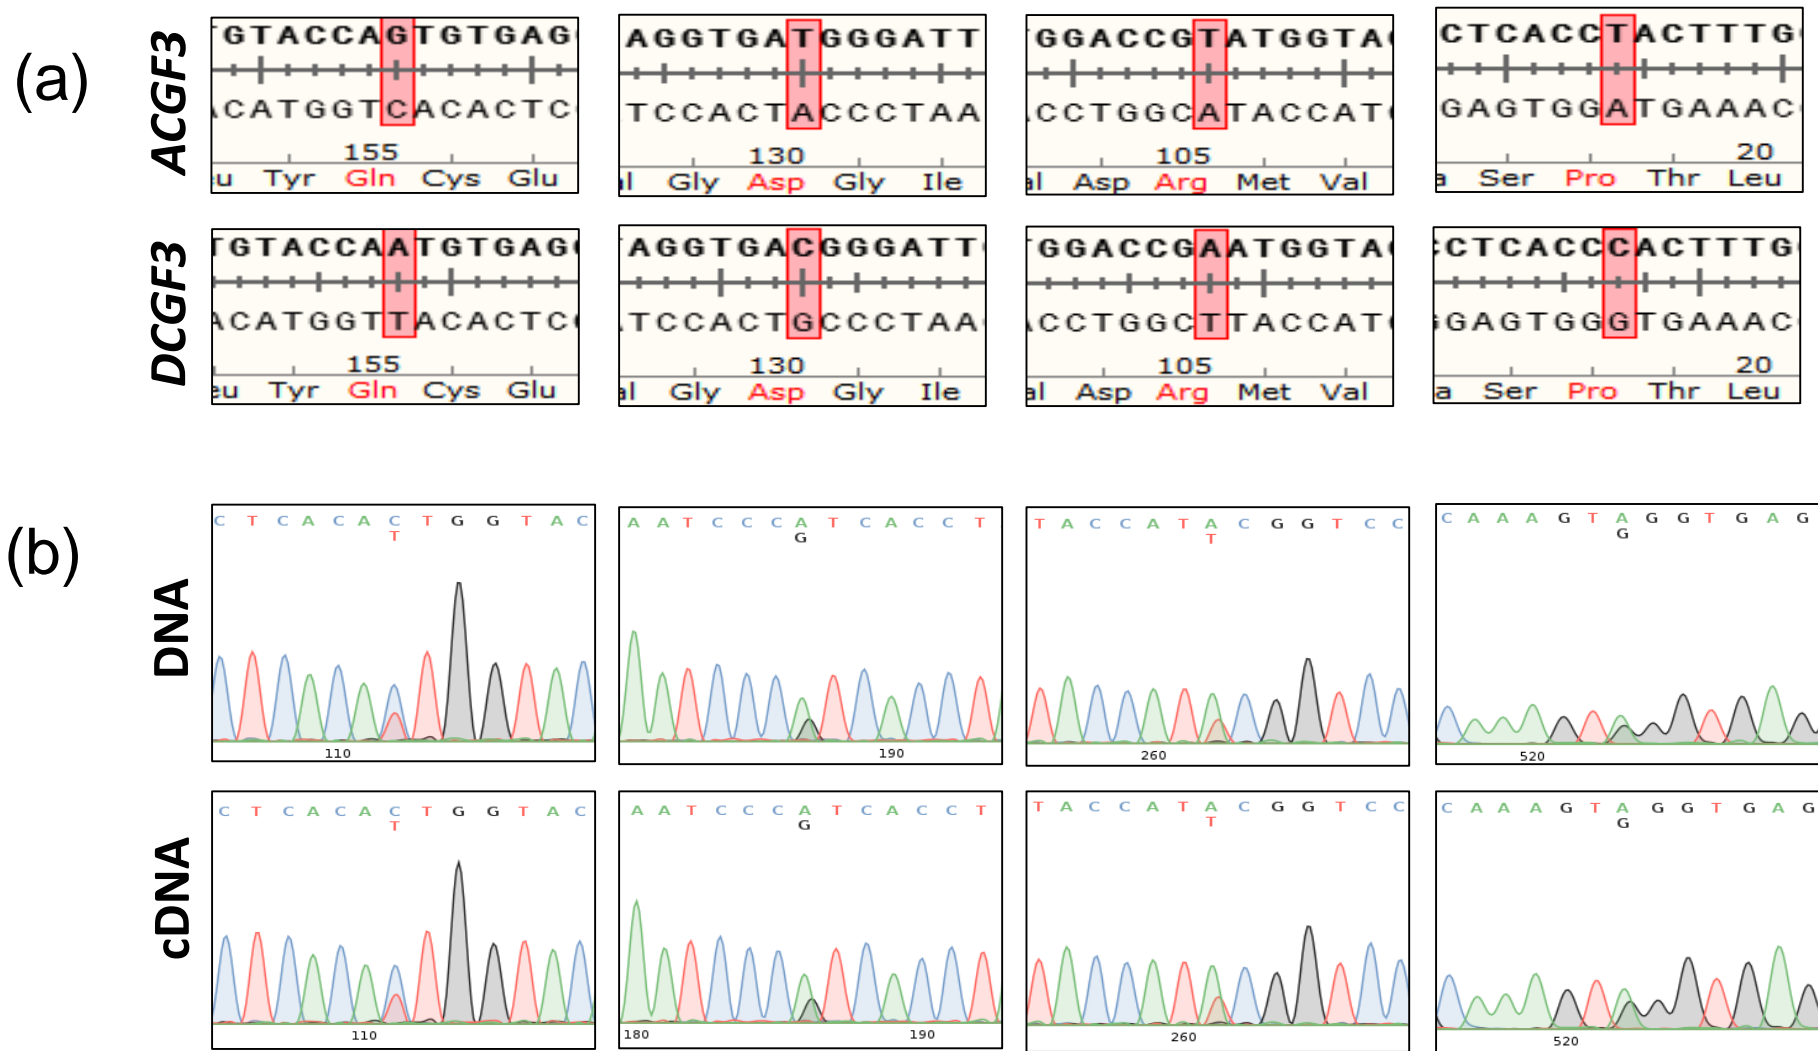

**Figure S11** Sequencing results showing four different SNPs that differentiate A and D subgenome *GoPGF* (synonym *CGF3*) gene sequence showing four SNPs between A and D homeologs; (b) chromatograms showing the expected SNPs between the two homeologs of the *GoPGF* (synonym *CGF3*) gene in genomic DNA and cDNA samples

gene sequence showing four SNPs between A and D homeologs; (b) chromatograms showing the expected SNPs between the two homeologs of the *GoPGF* (synonym *CGF3*) gene in genomic DNA and cDNA samples



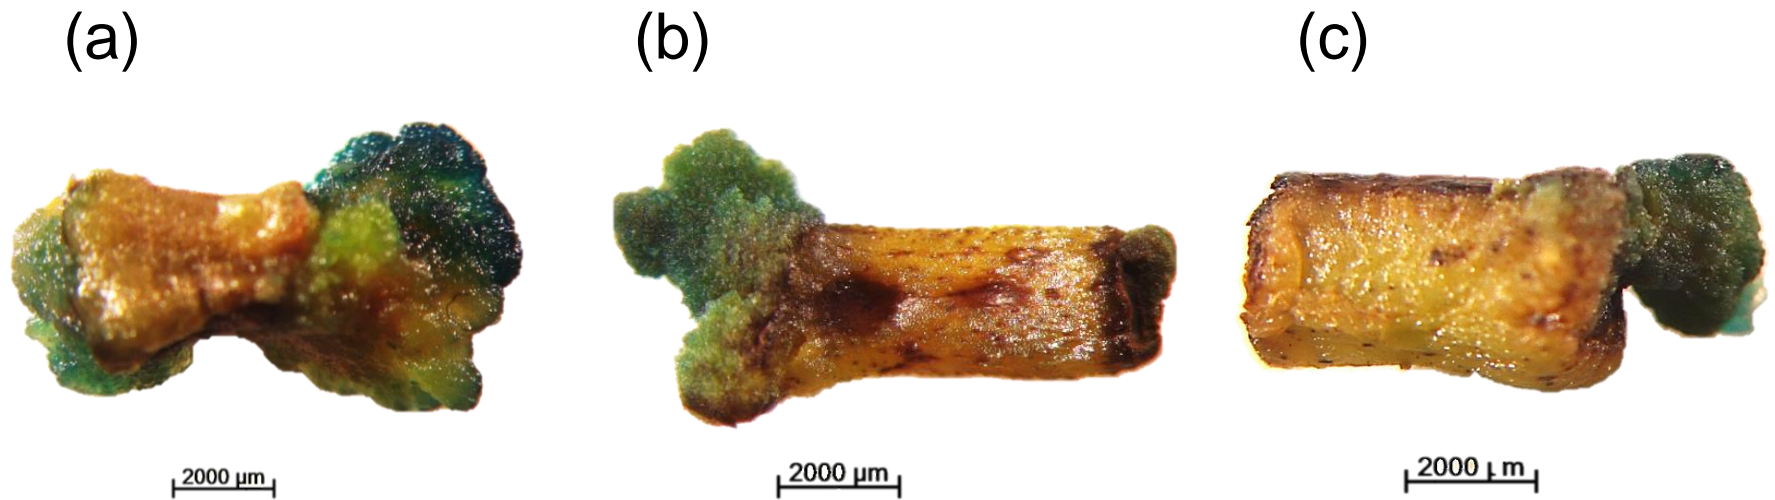

**Figure S12** Promoter (2.05 kb) activity evaluation of the D subgenome *GoPGF* (synonym *CGF3*) gene from glanded and glandless cotton using *gusA* as the reporter gene. (a) CaMV 35S promoter (used as a positive control); (b) 2 kb promoter from glanded cotton; (c) 2 kb promoter from glandless cotton.

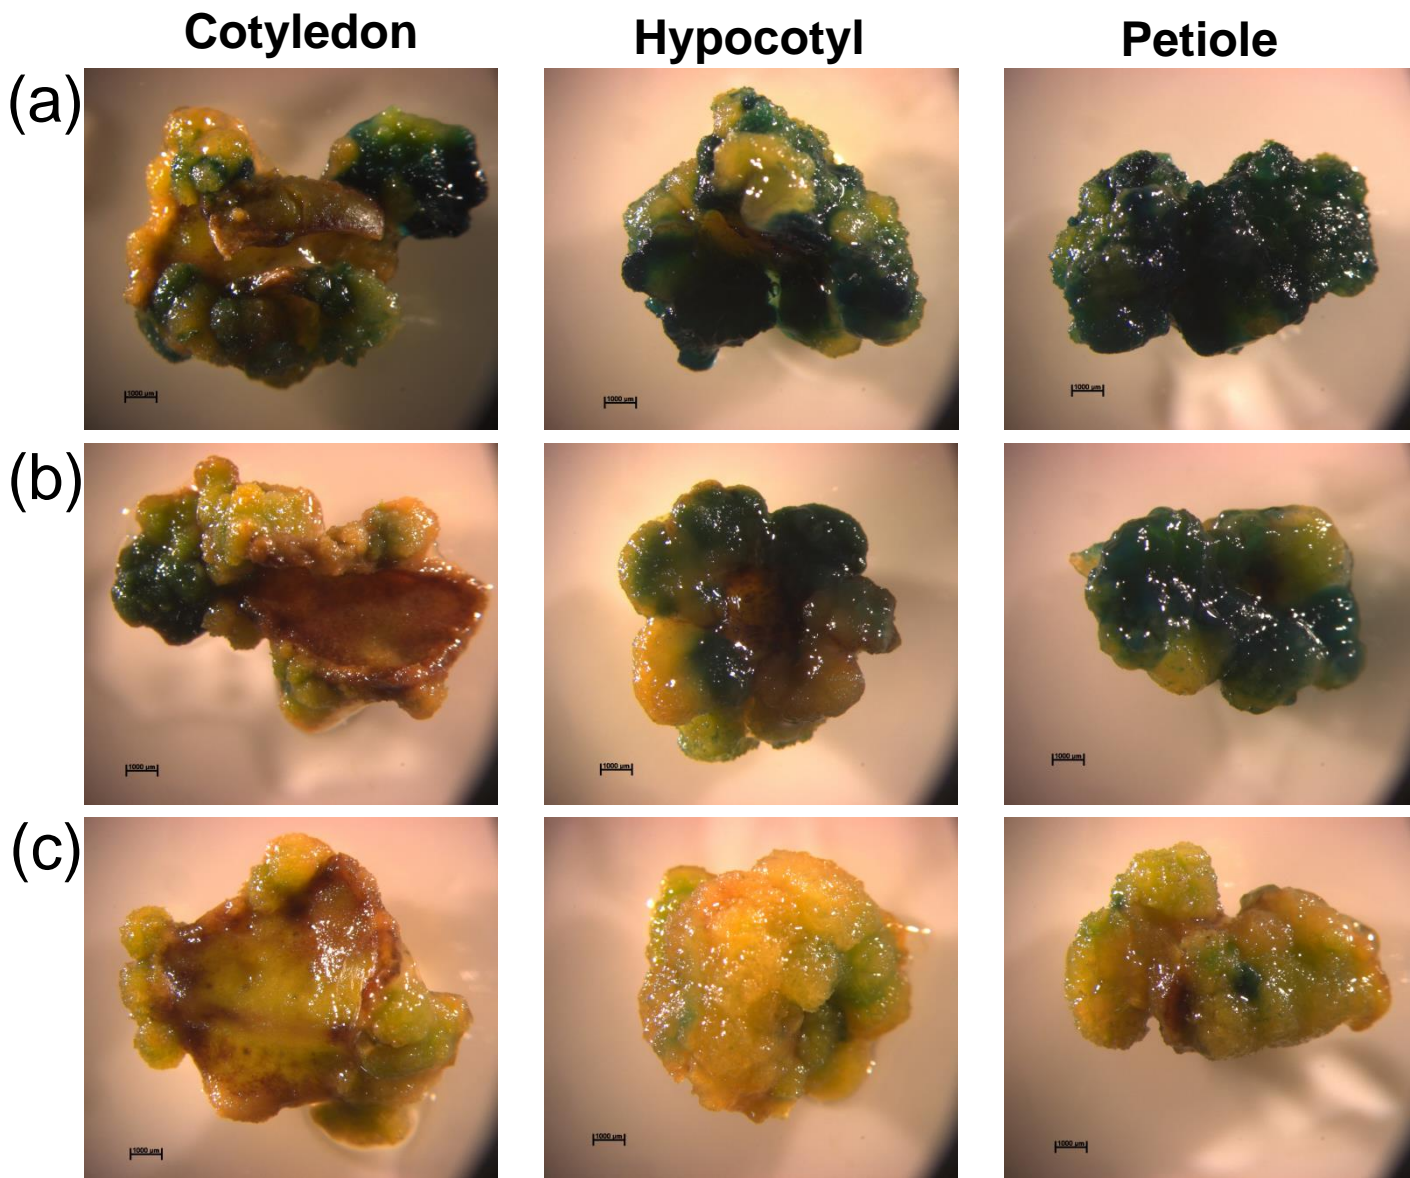

**Figure S13** Promoter (~4.2 kb) activity evaluation of the D subgenome *GoPGF* (synonym *CGF3*) gene from glanded and glandless cotton using *gusA* as the reporter gene. (a) CaMV 35S promoter (used as a positive control); (b) ~4.2 kb promoter from glanded cotton; (c) ~4.2 kb promoter from glandless cotton.

**Control**

**236**

**237**

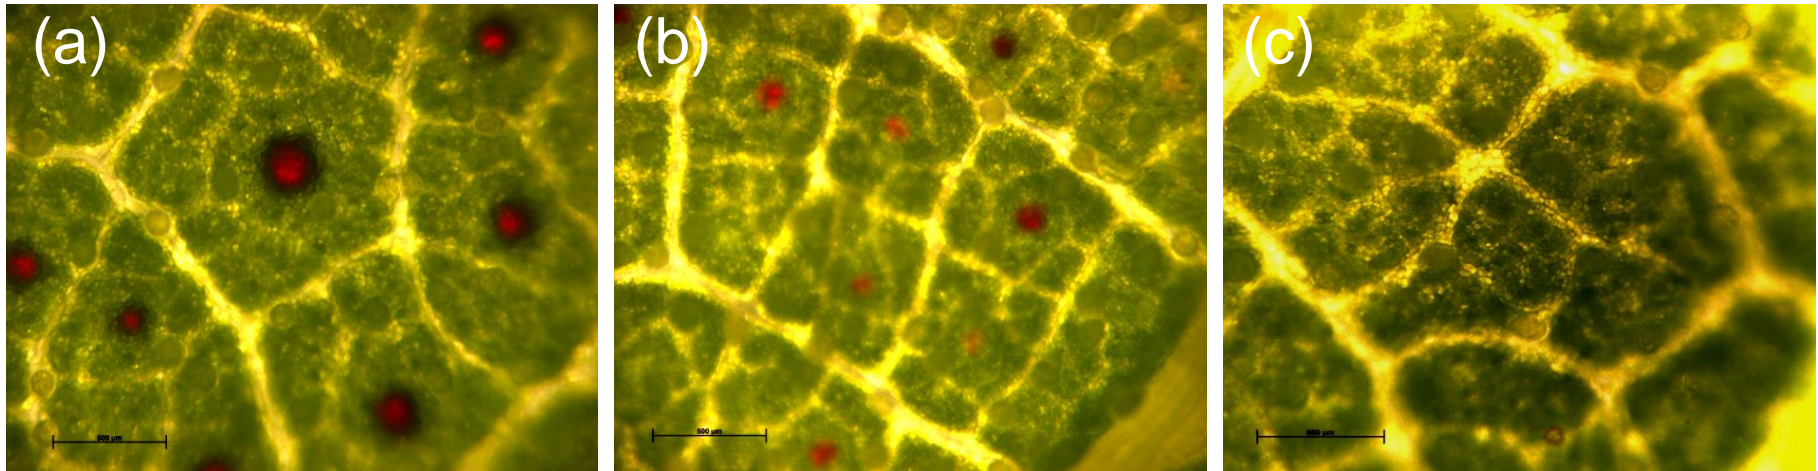

**Figure S14** Effect of CRISPR/Cas9-mediated knockout of *CGF2* and *GoPGF* (synonym *CGF3*) genes on gland formation in T0 plants in comparison to glanding pattern seen in a wild-type, control cotton plant. Microscopic images of leaves undergoing expansion: (a) control plant showing well developed glands, (b) line 236-10 showing smaller and malformed glands, (c) line 237-3 showing complete absence of glands.

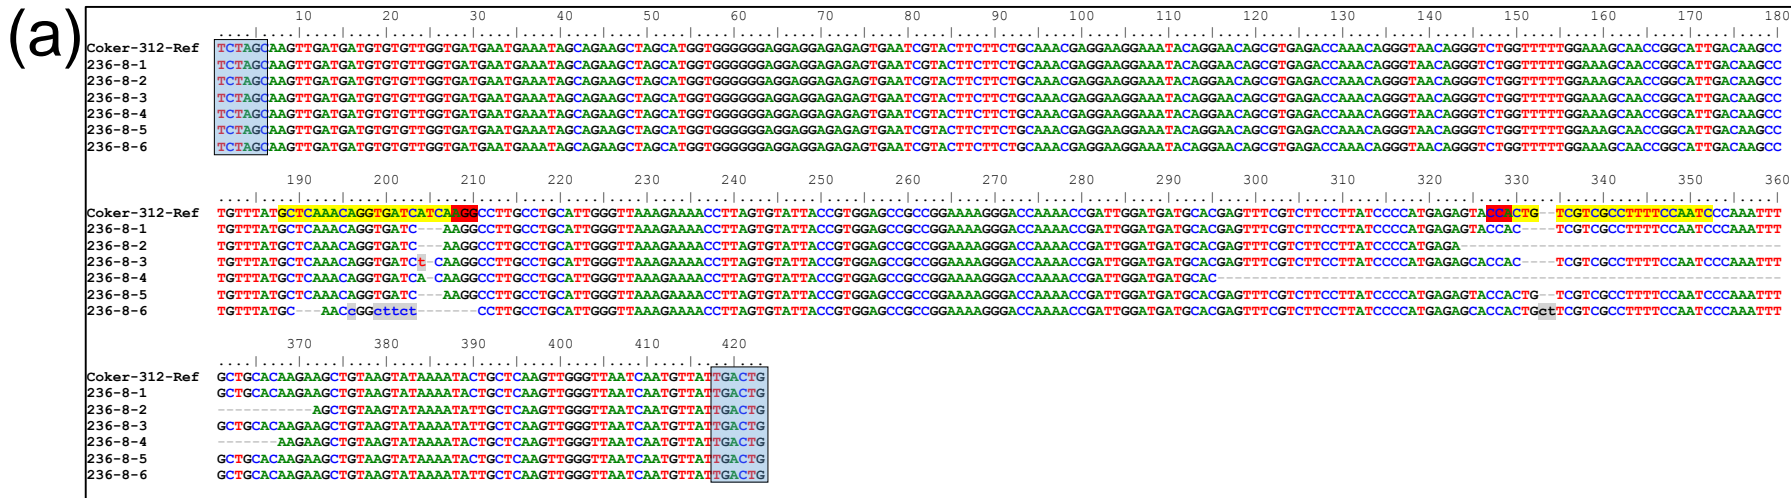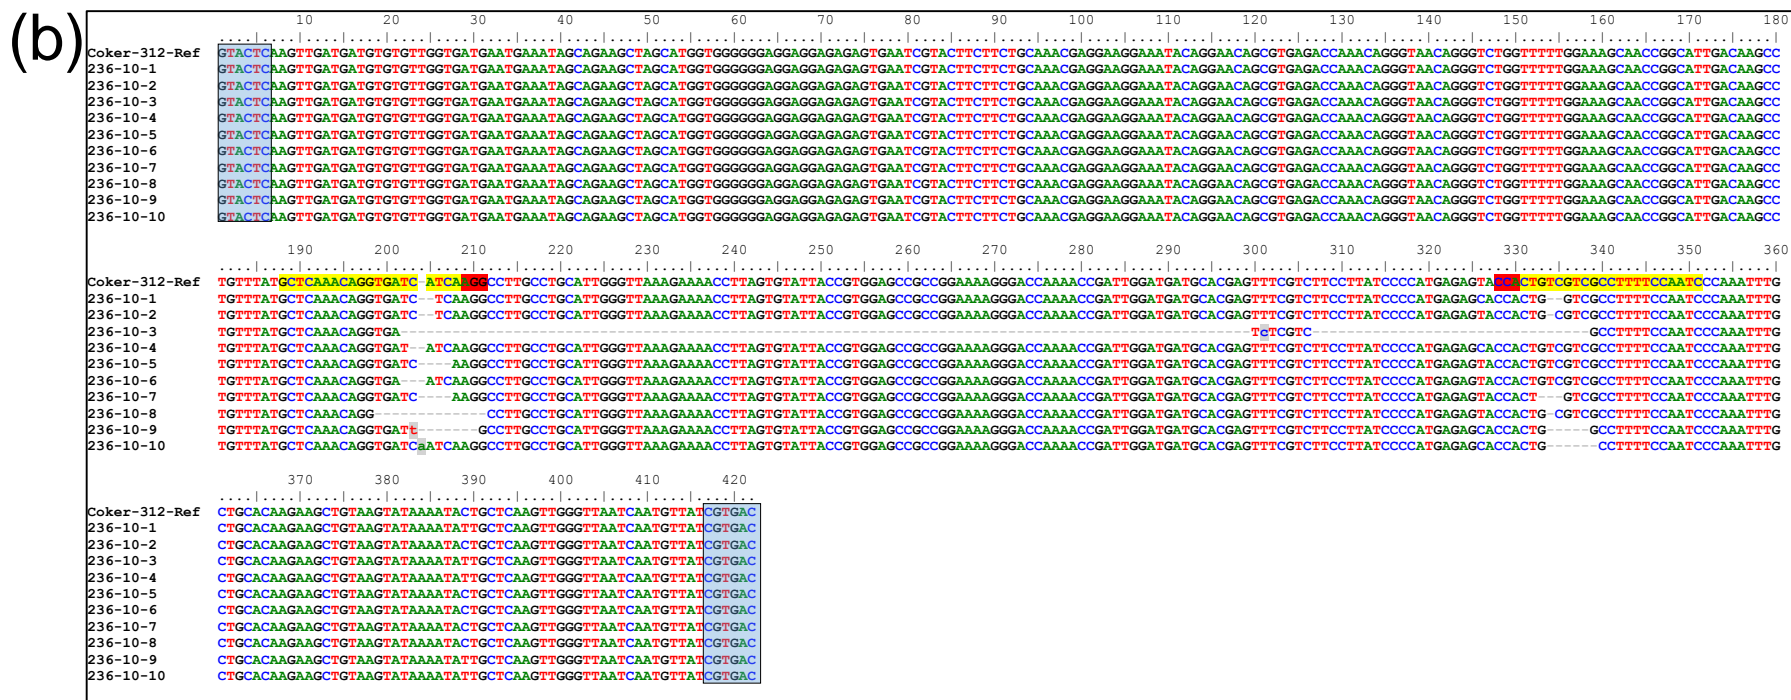

**Figure S15** Mutations observed in two *CGF2* knockouts lines, (a) 236-8 and (b) 236-10. The two target sites are highlighted yellow and PAM sequences are red. Nucleotide insertions are shown in lower case and highlighted grey.



(a)

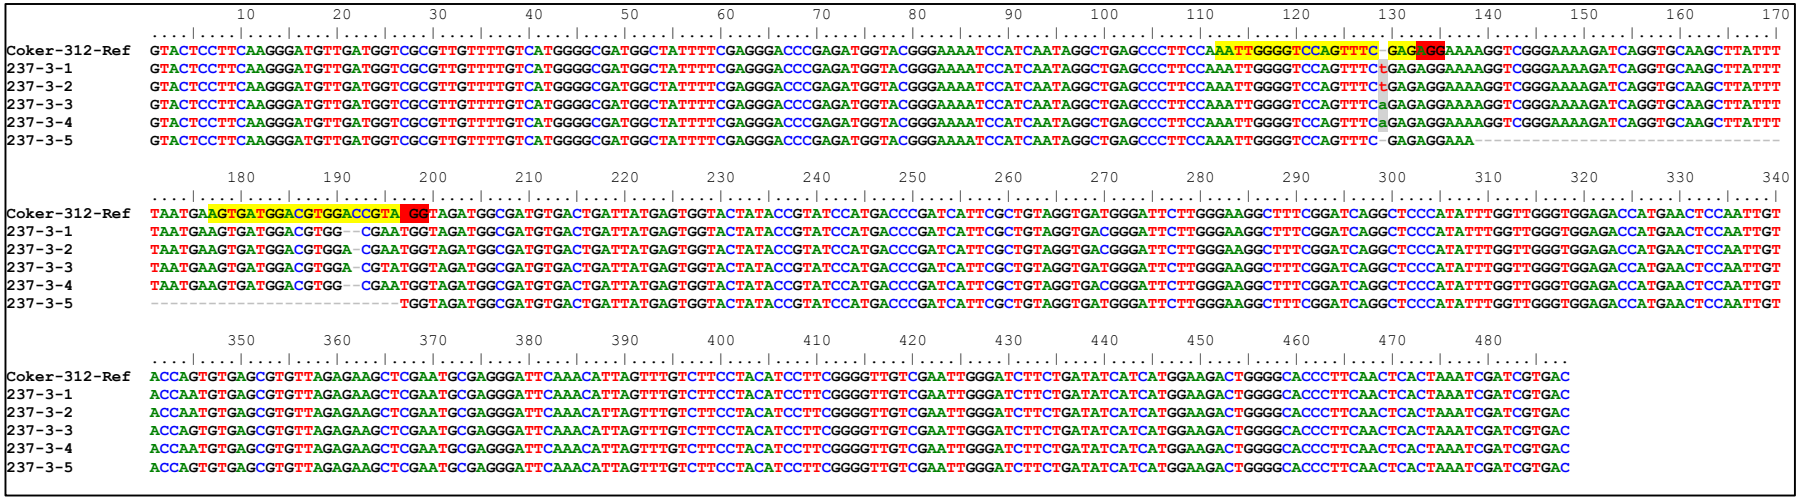

(b)

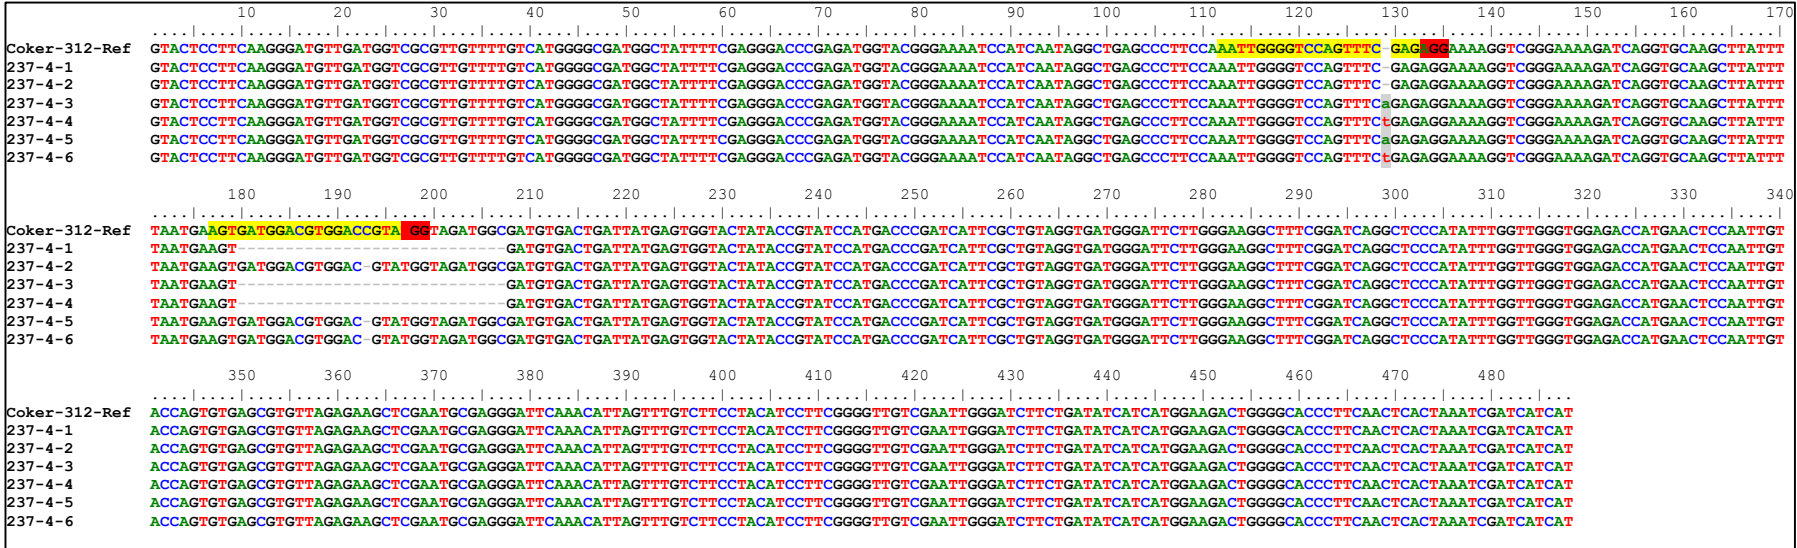

**Figure S16** Mutations observed in two *GoPGF* (synonym *CGF3*) knockout lines, (a) 237-3 and (b) 237-4. The two target sites are highlighted yellow and PAM sequences red. Nucleotide insertions are shown in lower case and highlighted grey.



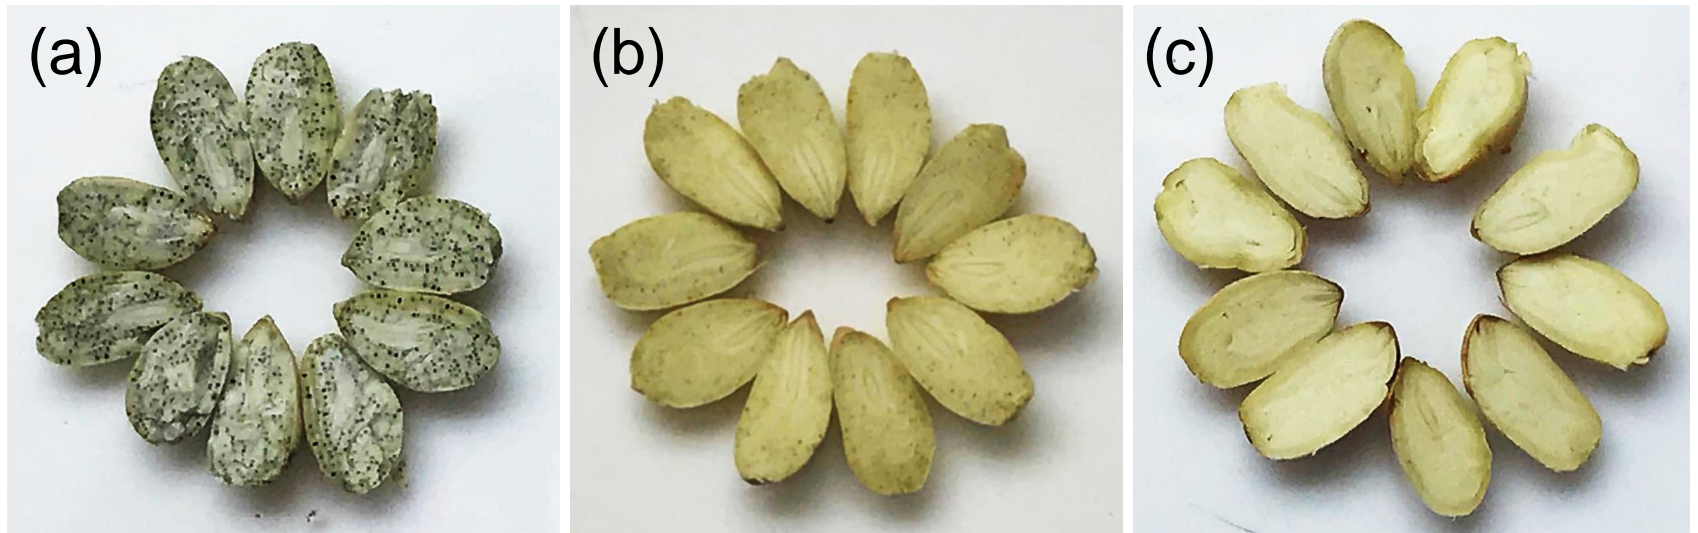

**Figure S17** Effect of CRISPR/Cas9-mediated knockout of *CGF2* and *GoPGF* (synonym *CGF3*) genes on gland formation observed in cottonseed kernels. (a) Seeds of control plant showing well developed glands;(b) T1 seeds of line 236-10 showing smaller and malformed glands; (c) T1 seeds of line 237-3 showing complete absence of glands.

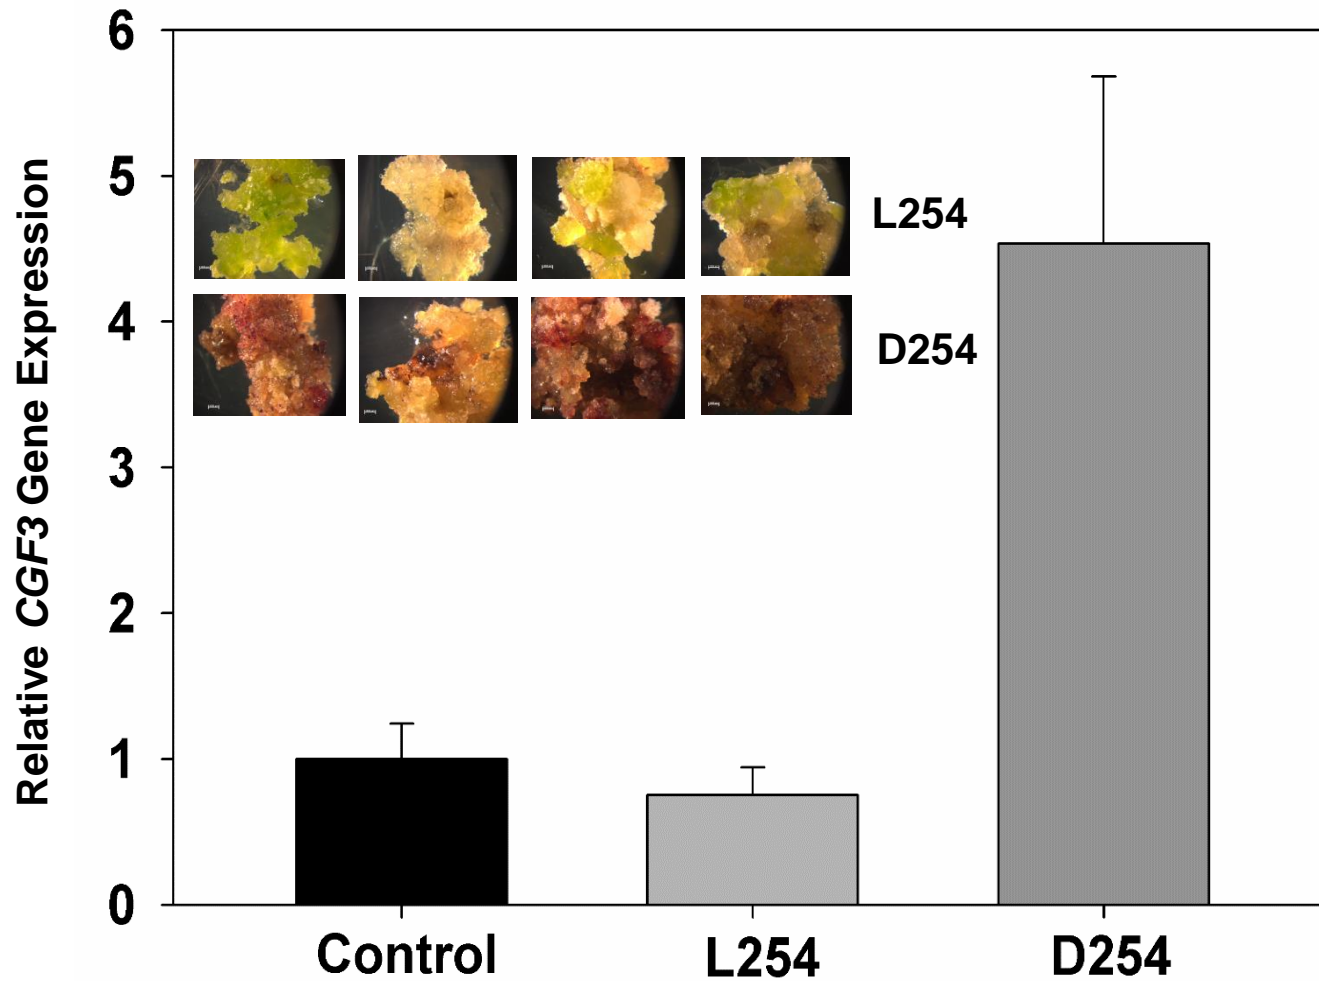

**Figure S18** qRT-PCR analysis of *GoPGF* (synonym *CGF3*) transcripts in cotton callus cultures obtained following transformation with *ACGF3* overexpression construct. L254: light-colored callus lines; D254 dark-colored callus lines; Control: non transgenic callus.

**Table S1** RNA-seq reads for glanded (GL; GVS4) and glandless (gl; GVS5) embryos at 14-, 16- and 32-days post-anthesis and their mapping to the reference genome.

| Tissue | Quality filtered paired reads | Uniquely mapped reads | Reads mapped >1 time | Total mapped reads | Reads not mapped  | % of reads not mapped | % of reads mapped one time | % of reads mapped >1 time | % total mapped |
|--------|-------------------------------|-----------------------|----------------------|--------------------|-------------------|-----------------------|----------------------------|---------------------------|----------------|
| 14GL   | 57,526,347                    | 41,539,721            | 13,219,522           | 54,759,243         | 2,767,104         | 4.81                  | 72.21                      | 22.98                     | 95.19          |
| 14gl   | 55,574,944                    | 39,411,172            | 13,043,137           | 52,454,309         | 3,120,635         | 5.62                  | 70.92                      | 23.47                     | 94.38          |
| 16GL   | 45,027,488                    | 31,957,244            | 10,240,975           | 42,198,219         | 2,829,269         | 6.28                  | 70.97                      | 22.74                     | 93.72          |
| 16gl   | 58,872,534                    | 41,914,607            | 13,567,579           | 55,482,186         | 3,390,348         | 5.76                  | 71.2                       | 23.05                     | 94.24          |
| 32GL   | 78,953,741                    | 57,667,091            | 18,523,395           | 76,190,486         | 2,763,255         | 3.5                   | 73.04                      | 23.46                     | 96.5           |
| 32gl   | 81,721,688                    | 60,837,058            | 17,351,295           | 78,188,353         | 3,533,335         | 4.32                  | 74.44                      | 21.23                     | 95.68          |
|        | <b>377,676,742</b>            | <b>273,326,893</b>    | <b>85,945,903</b>    | <b>359,272,796</b> | <b>18,403,946</b> | <b>5.05</b>           | <b>72.13</b>               | <b>22.82</b>              | <b>94.95</b>   |

**Table S2** Genes that expressed at higher levels in the glanded embryos (STV GL; GVS4; *Gl<sub>2</sub>Gl<sub>2</sub>Gl<sub>3</sub>Gl<sub>3</sub>*) in comparison to those in the glandless (STV gl; GVS5; *gl<sub>2</sub>gl<sub>2</sub>gl<sub>3</sub>gl<sub>3</sub>*) embryos at 14-days post-anthesis stage of development based on RNA-seq analysis. Genes encoding putative transcription factors were tested for their role in gland formation using virus-induced gene silencing (VIGS). Note that because of a high degree of homology between the two homeologs, the same VIGS construct will silence both the copies in A and D subgenomes.

| Gene        | <i>G. hirsutum</i><br>Chrom-<br>osome<br>Number | Shrunk<br>log fold<br>change | FDR      | Putative Function                                                             | Size<br>bp | VIGS | Laboratory<br>Designation |
|-------------|-------------------------------------------------|------------------------------|----------|-------------------------------------------------------------------------------|------------|------|---------------------------|
| Gh_A11G0909 | 11 (A11)                                        | 3.459546                     | 0.000000 | Basic helix-loop-helix (bHLH) DNA-binding family protein                      | 1488       | Yes  | <i>CGF1</i>               |
| Gh_D11G1055 | 24 (D11)                                        | 6.412898                     | 0.000000 | Basic helix-loop-helix (bHLH) DNA-binding family protein                      | 1488       |      | <i>CGF1</i>               |
| Gh_A01G0267 | 01 (A01)                                        | 4.992123                     | 0.000001 | NAC domain containing protein 42                                              | 960        | Yes  | <i>CGF2</i>               |
| Gh_D01G0278 | 14 (D01)                                        | 4.656837                     | 0.000013 | NAC (No Apical Meristem) domain transcriptional regulator superfamily protein | 963        |      | <i>CGF2</i>               |
| Gh_A12G2172 | 12 (A12)                                        | 6.231119                     | 0.000000 | Basic helix-loop-helix (bHLH) DNA-binding family protein                      | 1428       | Yes  | <i>CGF3</i>               |
| Gh_D12G2351 | 25 (D12)                                        | 4.284841                     | 0.001531 | Basic helix-loop-helix (bHLH) DNA-binding family protein                      | 1428       |      | <i>CGF3</i>               |
| Gh_A10G0388 |                                                 | 4.903984                     | 0.000002 | Jasmonate-zim-domain protein 8                                                | 363        | Yes  |                           |
| Gh_D10G0403 |                                                 | 3.747897                     | 0.003033 | Jasmonate-zim-domain protein 8                                                | 363        |      |                           |
| Gh_A12G1233 |                                                 | 5.43426                      | 0.000000 | B-box type zinc finger family protein                                         | 393        | Yes  |                           |
| Gh_D12G1358 |                                                 | 2.11097                      | 0.000000 | B-box type zinc finger family protein                                         | 393        |      |                           |
| Gh_A01G0135 |                                                 | 2.064435                     | 0.000139 | Zinc finger C-x8-C-x5-C-x3-H type family protein                              | 1020       | No   |                           |
| Gh_A04G0546 |                                                 | 4.370138                     | 0.001173 | HEAT repeat ;WD domain, G-beta repeat protein                                 | 192        | No   |                           |
| Gh_A05G0334 |                                                 | 2.677935                     | 0.000088 | NAD(P)-binding Rossmann-fold superfamily protein                              | 987        | No   |                           |
| Gh_A05G2973 |                                                 | 2.888822                     | 0.000000 | Lysine histidine transporter 1                                                | 1077       | No   |                           |
| Gh_A06G0017 |                                                 | 2.788916                     | 0.000000 | Thioredoxin superfamily protein                                               | 555        | No   |                           |
| Gh_A06G0018 |                                                 | 2.25659                      | 0.008180 | Expansin 11                                                                   | 768        | No   |                           |

|                 |  |          |          |                                                                          |      |     |  |
|-----------------|--|----------|----------|--------------------------------------------------------------------------|------|-----|--|
| Gh_A06G0213     |  | 2.775923 | 0.012662 | Uncharacterized protein                                                  | 957  | No  |  |
| Gh_A06G1947     |  | 4.176235 | 0.000392 | NAC domain containing protein 42                                         | 930  | Yes |  |
| Gh_A08G2056     |  | 2.912436 | 0.000230 | NAC domain containing protein 42                                         | 867  | Yes |  |
| Gh_A10G0667     |  | 5.494345 | 0.000000 | Pectin lyase-like superfamily protein                                    | 2202 | No  |  |
| Gh_A12G1784     |  | 1.995549 | 0.000013 | Integrase-type DNA-binding superfamily protein                           | 711  | No  |  |
| Gh_A12G2056     |  | 2.388568 | 0.000000 | Uncharacterized protein                                                  | 1251 | No  |  |
| Gh_A13G0385     |  | 2.137374 | 0.023065 | S-methyl-5-thioribose kinase                                             | 660  | No  |  |
| Gh_D04G0529     |  | 3.720997 | 0.028702 | Phosphoenolpyruvate (pep)/phosphate translocator 2                       | 1251 | No  |  |
| Gh_D05G0292     |  | 2.546437 | 0.031860 | myb-like transcription factor family protein                             | 768  | Yes |  |
| Gh_D05G0439     |  | 2.126081 | 0.007311 | NAD(P)-binding Rossmann-fold superfamily protein                         | 894  | No  |  |
| Gh_D06G1859     |  | 2.756698 | 0.000000 | P-loop containing nucleoside triphosphate hydrolases superfamily protein | 987  | No  |  |
| Gh_D07G2328     |  | 4.295568 | 0.000100 | WRKY family transcription factor family protein                          | 501  | Yes |  |
| Gh_D08G2336     |  | 3.448213 | 0.031860 | Uncharacterized protein                                                  | 345  | No  |  |
| Gh_D11G0631     |  | 3.446236 | 0.007958 | Uncharacterized protein                                                  | 417  | No  |  |
| Gh_D11G0996     |  | 4.052173 | 0.008242 | Cytokinin response factor 6                                              | 894  | No  |  |
| Gh_D12G1160     |  | 5.449322 | 0.000000 | Basic helix-loop-helix (bHLH) DNA-binding family protein                 | 1464 | Yes |  |
| Gh_Sca007330G01 |  | 4.131307 | 0.000000 | Plant invertase/pectin methylesterase inhibitor superfamily protein      | 630  | No  |  |

**Table S3** Primers used to amplify segments of the coding sequence of the target gene for cloning into TRV2 binary vector to conduct VIGS experiments.

| Primers            | Sequences (5' to 3')                   | size |
|--------------------|----------------------------------------|------|
| GhA01G0267 EcoRI-F | CGgaattcCTGGGATCTCCCGAAAGCTAGC         | 634  |
| GhA01G0267 SacI-R  | ACGCgagctcCTCATTCTATCTGTAACATGCCATTGGC |      |
| GhA10G0388 EcoRI-F | CGgaattcATGAGACGAAACTGCAACTTGGAG       | 357  |
| GhA10G0388 SacI-R  | ACGCgagctcGTAAGGAGAGGTAGCTTGGATTCCG    |      |
| GhA12G2172 EcoRI-F | CGgaattcATGTCTTCTCTTCTTCGTCTTCTC       | 600  |
| GhA12G2172 SacI-R  | ACGCgagctcCGATTTAGTGAGTTGAAGGGTGC      |      |
| GhA12G1233 XbaI-F  | GCtctagaATGTGCAAAGGTTTACAACAAGGAAG     | 366  |
| GhA12G1233 XmaI-R  | TCCcccgggGGTTGTTGAAGACTCGGTTTCCGTG     |      |
| GhD07G2328 XbaI-F  | GCtctagaTCAAATGTTCTTCCCTATCTCGG        | 491  |
| GhD07G2328 XmaI-R  | TCCcccgggTCAGAAGGGAGTGTAATCTGCA        |      |
| GhD11G1055 XbaI-F  | GCtctagaATGGAAGTCCTCATAATGTCTCCCTC     | 628  |
| GhD11G1055 XmaI-R  | TCCcccgggCCAGACCAATGAGATCGGATTC        |      |
| GhA06G1947 XbaI-F  | GCtctagaATGGAAGATGTGGAGATGGAGA         | 505  |
| GhA06G1947 XmaI-R  | TCCcccgggCTTCAAAGTTGTCTTTGGCATG        |      |
| GhD05G0292 XbaI-F  | GCtctagaATGGGCAGGAAATGCTCACATTG        | 614  |
| GhD05G0292 XmaI-R  | TCCcccgggAATCAATGCATCCGTACTIONGCAAC    |      |
| GhD12G1160 XbaI-F  | GCtctagaATGGAAGAACTAATCATCTCTCCATC     | 587  |
| GhD12G1160 XmaI-R  | TCCcccgggGATCCAAGTTCAAGAACACCACG       |      |
| GhA08G2056 XbaI-F  | GCtctagaATGAGCATGGTCCATGGCACCA         | 630  |
| GhA08G2056 XmaI-R  | TCCcccgggTATCTTAACGATGGCTGCATGAACC     |      |

**Table S4** Primers used to amplify and isolate *CGF* genes from A and D subgenomes of glanded (GVS4) and glandless (GVS5) cotton plants.

| Primer           | Sequence 5' to 3'                    | Purpose                       |
|------------------|--------------------------------------|-------------------------------|
| A11GhCGF-prom-3F | CTCTCCAAAATCAACCATACTCACAAATGCCTAC   | To amplify CGF1 from A genome |
| A11GhCGF-term-R  | CTCCATGGCATCCTCAAGTCACAG             |                               |
| D11GhCGF-prom-F  | ATCTTCTCACTCCGAAACCGACC              | To amplify CGF1 from D genome |
| D11GhCGF-term-R  | TGGAAGAAACAAGATCGGATGTGGC            |                               |
| A01CGF2-P-F      | GGCTGTCAGATGTAGTAAAATCAGTATTGGT      | To amplify CGF2 from A genome |
| A01CGF2-T-R      | CAAATATATATGGGTCTGATATGCATGTCTCC     |                               |
| D01CGF2-P-F      | CAAAGTGTTGATTTCAAGCAATAACTTGTAGC     | To amplify CGF2 from D genome |
| D01CGF2-T-R      | CGTAACAAAATGGTTTTTCGTATGTTACGTATC    |                               |
| A12CGF-prom-F    | CATCCATACAAACTATTAACAAGATTACGTCGGATG | To amplify CGF3 from A genome |
| A12CGF-term-R    | GTGATCATCATCAAGCACAGGCTACTG          |                               |
| D12CGF-Prom-F    | CAAACCATCAACAAGACTACGTTGGACA         | To amplify CGF3 from D genome |
| D12CGF-term-R    | CTAATTTAAGTGATCATCATCAAGCACAGTCTAATC |                               |

**Table S5** Guide sequences used to target *CGF2* and *GoPGF* (synonym *CGF3*) genes.

| Target name  | Sequence 5' to 3'     |
|--------------|-----------------------|
| CGF2-guide-1 | GCTCAAACAGGTGATCATCA  |
| CGF2-guide-2 | GATTGGAAAAGGCGACGACAG |
| CGF3-guide-1 | AATTGGGGTCCAGTTTCGAG  |
| CGF3-guide-2 | AGTGATGGACGTGGACCGTA  |
| CGF3-guide-3 | GCTTCTCTAACACGCTCACAC |



**Table S6** Primers used for amplicon sequencing of regenerated plants targeted with LCT236, LCT237 and LCT238 constructs. These primers contained barcodes to distinguish amplicons from different plants.

| <b>Primers</b>  | <b>Sequences (5'-3')</b>         |
|-----------------|----------------------------------|
| A_CGF2.Ampseq-F | gtactcAAGTTGATGATGTGTGTTGGTGATG  |
| B_CGF2.Ampseq-F | tctagcAAGTTGATGATGTGTGTTGGTGATG  |
| C_CGF2.Ampseq-F | gagtcaAAGTTGATGATGTGTGTTGGTGATG  |
| D_CGF2.Ampseq-F | gctagtAAGTTGATGATGTGTGTTGGTGATG  |
| E_CGF2.Ampseq-F | atgctaAAGTTGATGATGTGTGTTGGTGATG  |
| F_CGF2.Ampseq-F | ctgcgaAAGTTGATGATGTGTGTTGGTGATG  |
| G_CGF2.Ampseq-R | cgactgATAACATTGATTAACCCAACTTGAGC |
| H_CGF2.Ampseq-R | tgatagATAACATTGATTAACCCAACTTGAGC |
| I_CGF2.Ampseq-R | gtcacgATAACATTGATTAACCCAACTTGAGC |
| J_CGF2.Ampseq-R | atgatgATAACATTGATTAACCCAACTTGAGC |
| K_CGF2.Ampseq-R | cagtcaATAACATTGATTAACCCAACTTGAGC |
| L_CGF2.Ampseq-R | acgtcaATAACATTGATTAACCCAACTTGAGC |
| A_CGF3.Ampseq-F | gtactcCTTCAAGGGATGTTGATGGTCG     |
| B_CGF3.Ampseq-F | tctagcCTTCAAGGGATGTTGATGGTCG     |
| C_CGF3.Ampseq-F | gagtcaCTTCAAGGGATGTTGATGGTCG     |
| D_CGF3.Ampseq-F | gctagtCTTCAAGGGATGTTGATGGTCG     |
| E_CGF3.Ampseq-F | atgctaCTTCAAGGGATGTTGATGGTCG     |
| F_CGF3.Ampseq-F | ctgcgaCTTCAAGGGATGTTGATGGTCG     |
| G_CGF3.Ampseq-R | cgactgATCGATTTAGTGAGTTGAAGGGTGC  |
| H_CGF3.Ampseq-R | tgatagATCGATTTAGTGAGTTGAAGGGTGC  |
| I_CGF3.Ampseq-R | gtcacgATCGATTTAGTGAGTTGAAGGGTGC  |
| J_CGF3.Ampseq-R | atgatgATCGATTTAGTGAGTTGAAGGGTGC  |
| K_CGF3.Ampseq-R | cagtcaATCGATTTAGTGAGTTGAAGGGTGC  |
| L_CGF3.Ampseq-R | acgtcaATCGATTTAGTGAGTTGAAGGGTGC  |
